# Supplementary material for: Genome-wide analysis clarifies the population genetic structure of wild gilthead sea bream (Sparus aurata)
Source: PubMed Central journal article supplement (PMC7799848; doi:10.1371/journal.pone.0236230), 2021-01-11
Supplement: pone.0236230.s002.pdf [file pone.0236230.s002.pdf]

OL + BayEnv

### SNP 9677\_31

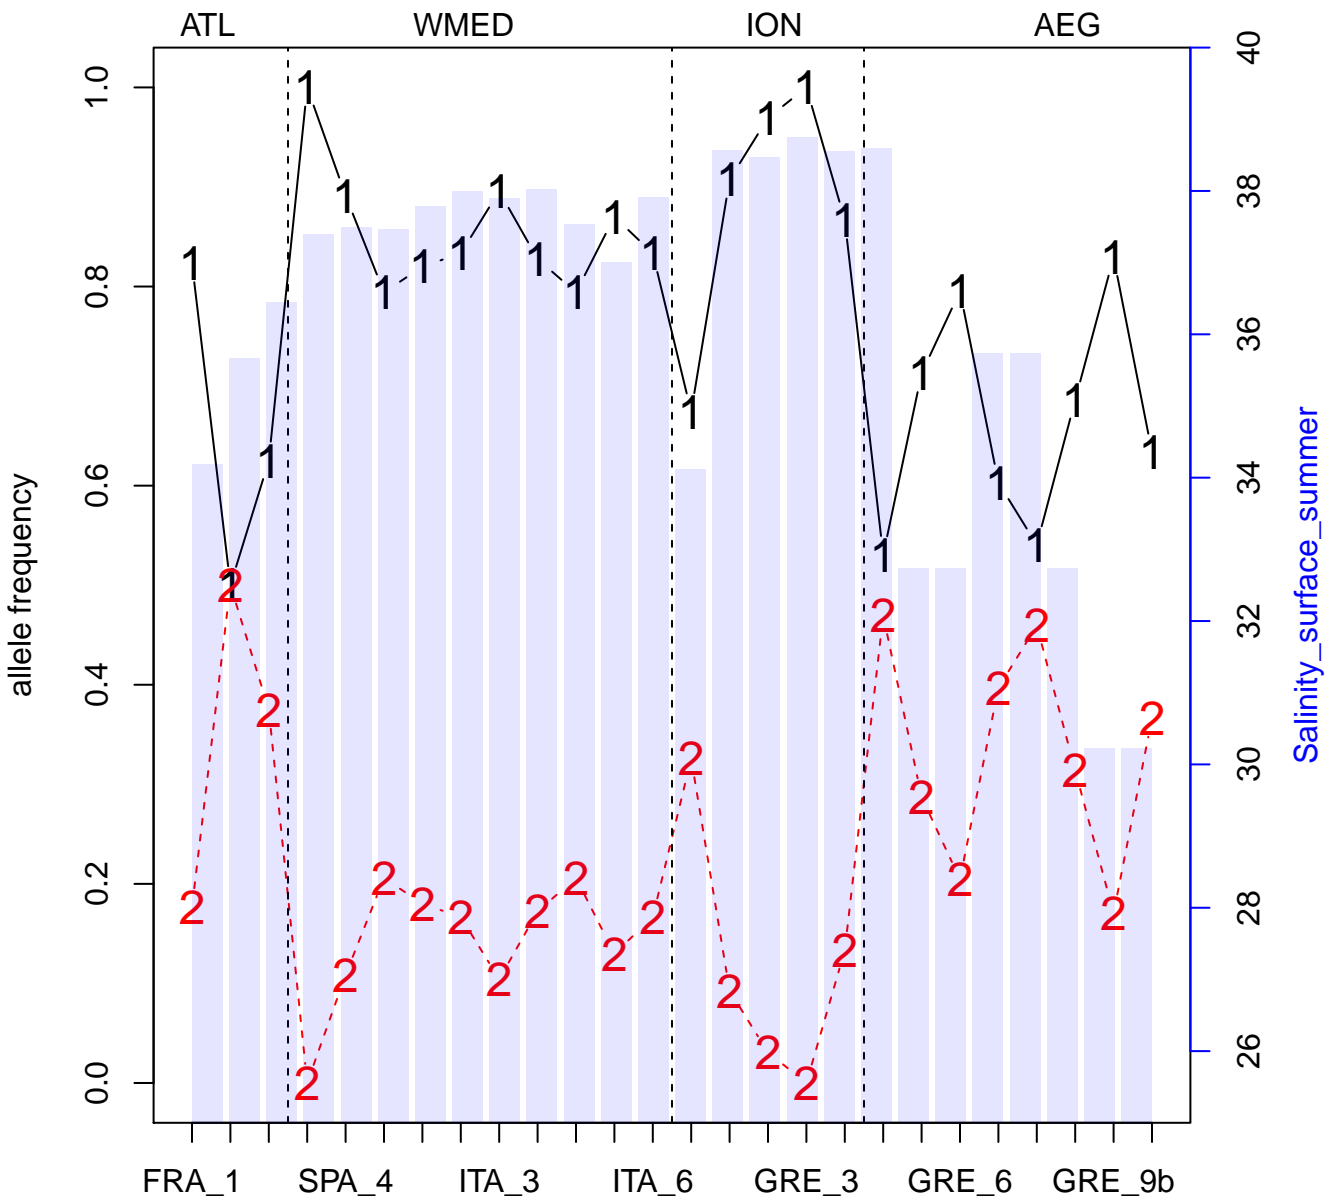

OL + BayEnv

### SNP 9633\_68

ATL

WMED

ION

AEG

allele frequency

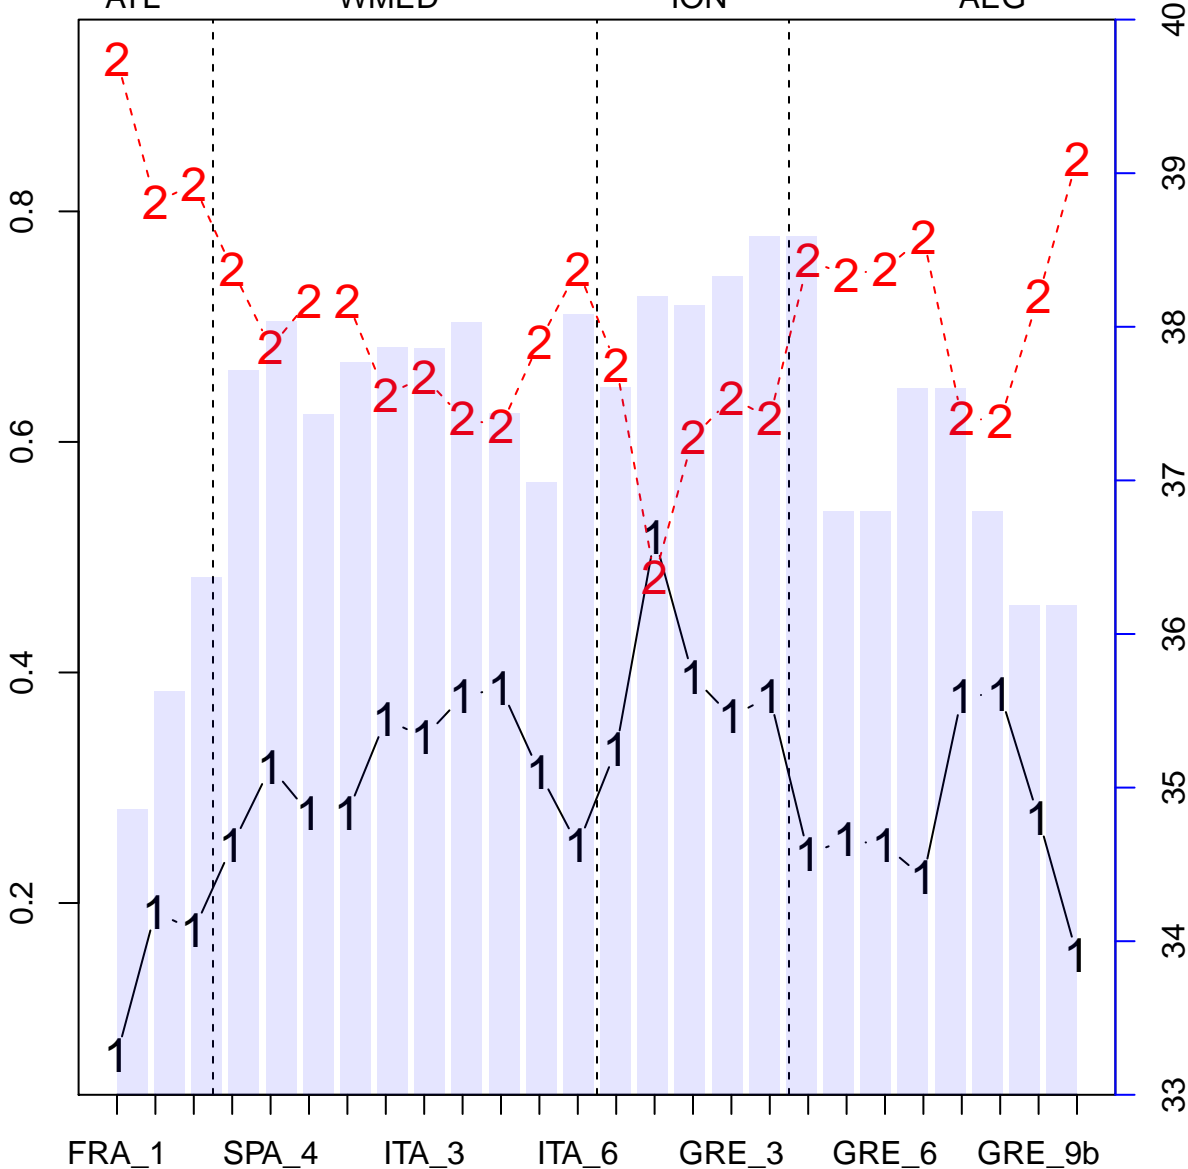

Salinity\_20m\_summer

40  
39  
38  
37  
36  
35  
34  
33

OL + BayEnv

SNP 13310\_71

ATL

WMED

ION

AEG

allele frequency

Temperature\_surface\_winter

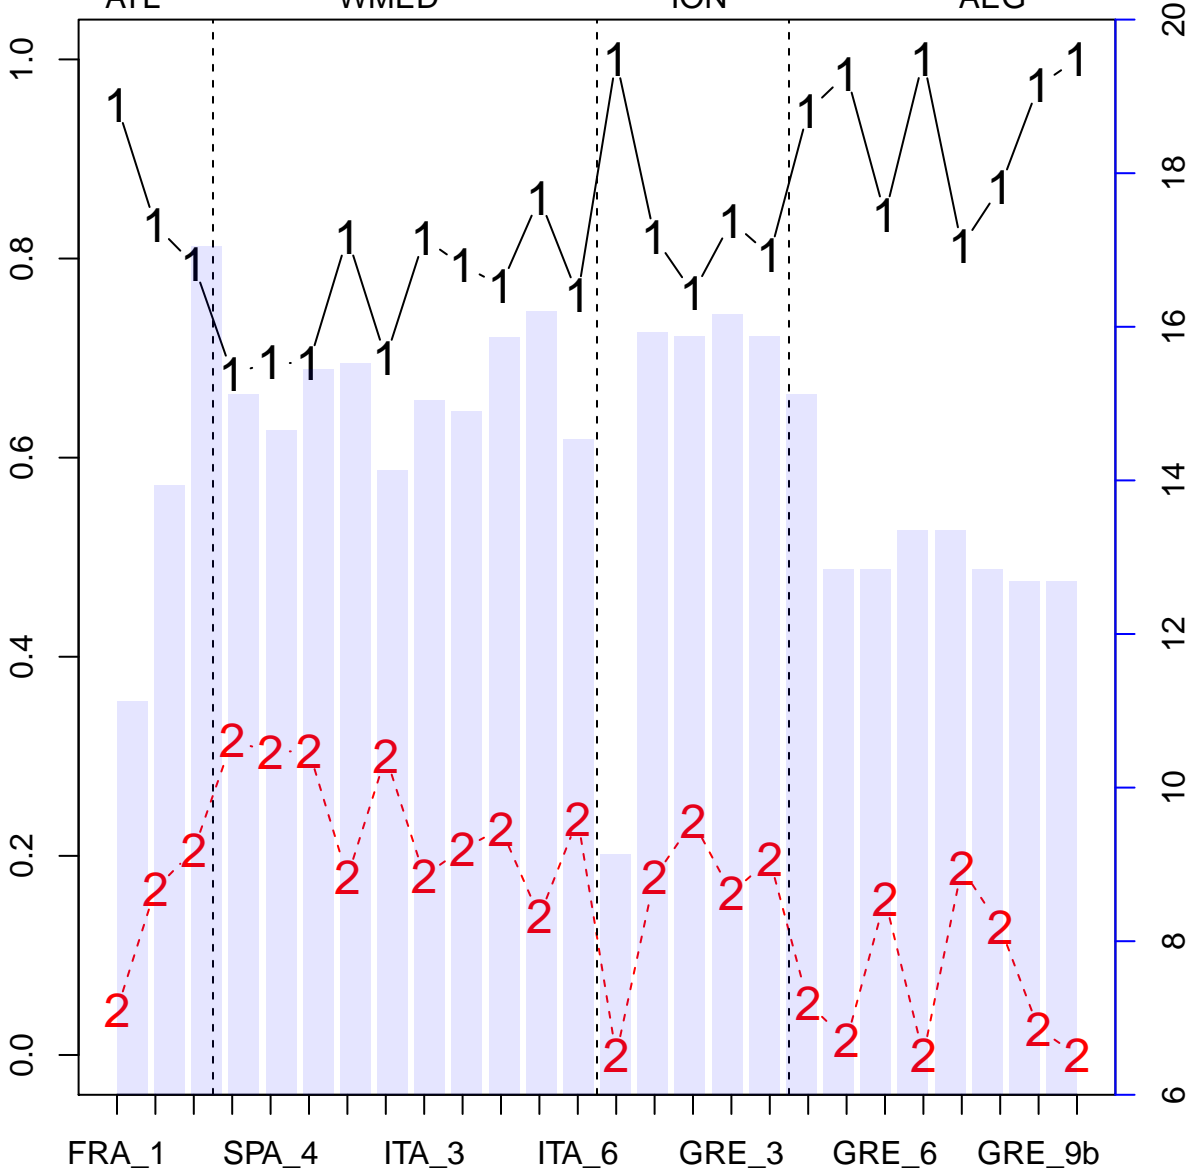

OL + BayEnv

SNP 2689\_62

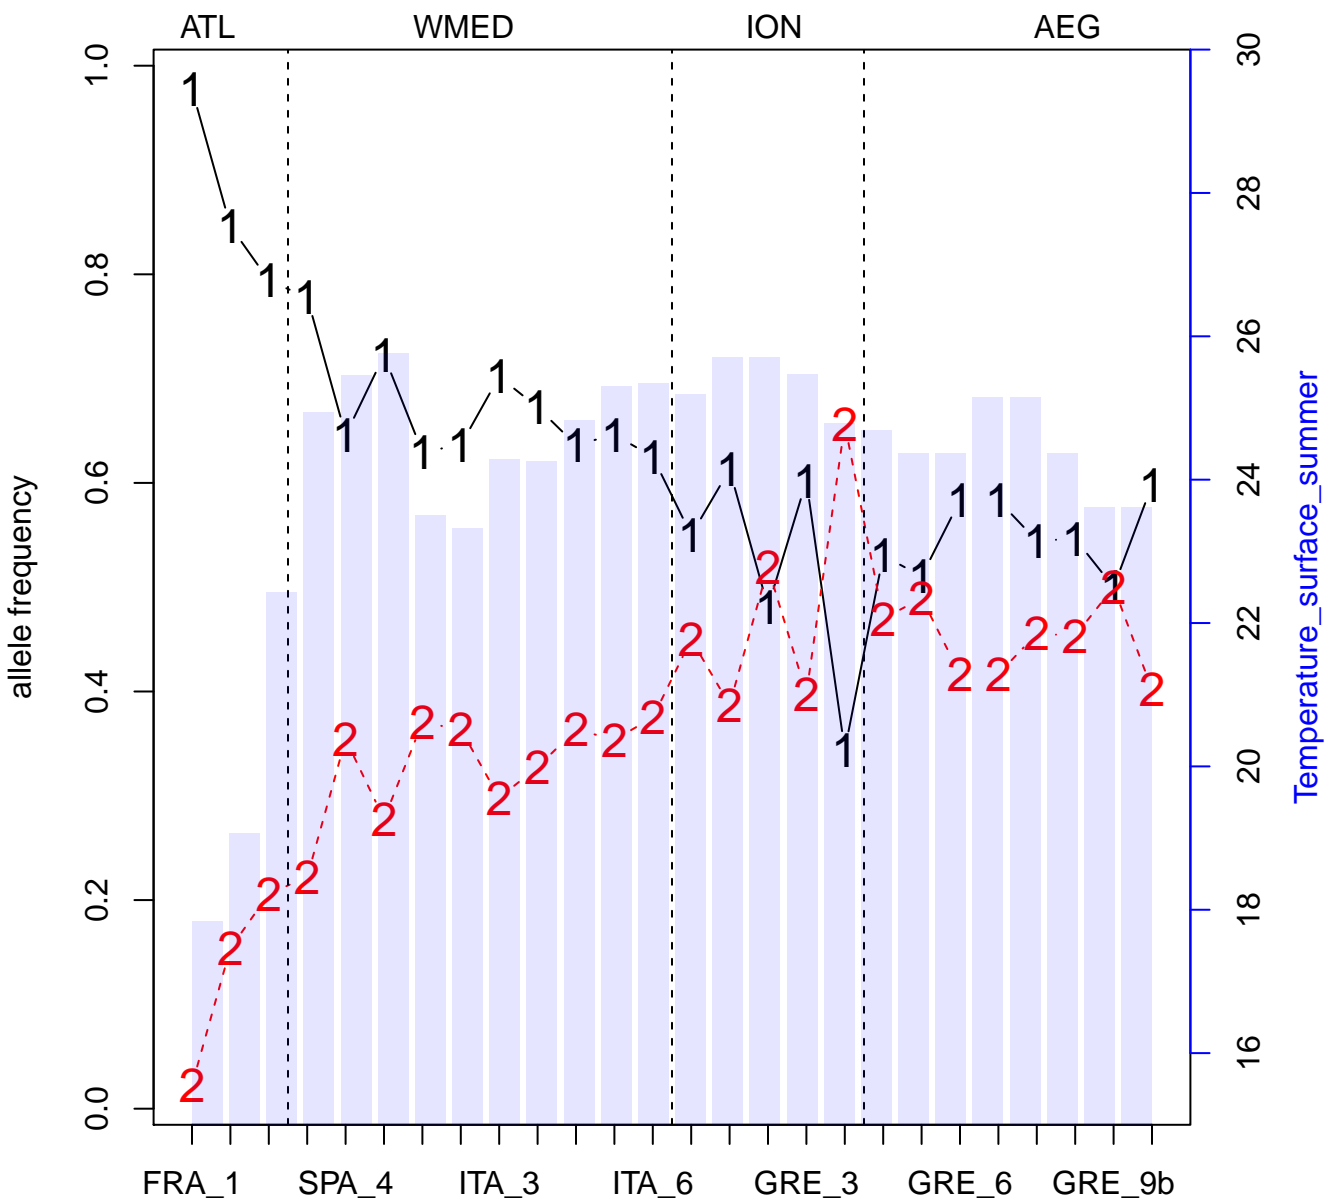

OL + BayEnv

SNP 8301\_44

ATL

WMED

ION

AEG

allele frequency

Temperature\_surface\_summer

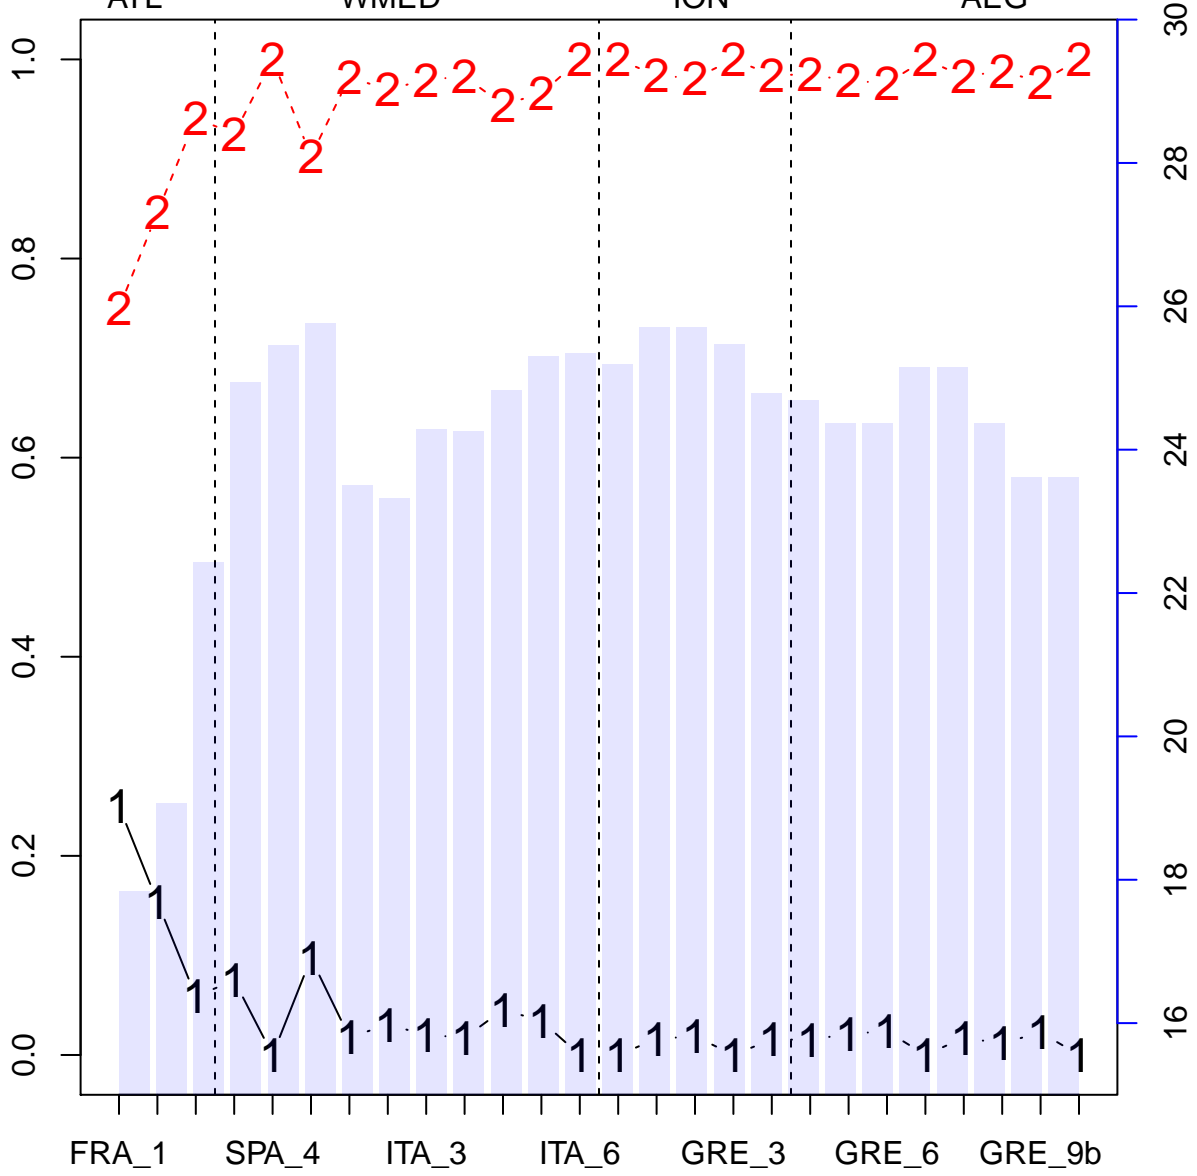

OL + BayEnv

### SNP 10734\_15

ATL

WMED

ION

AEG

allele frequency

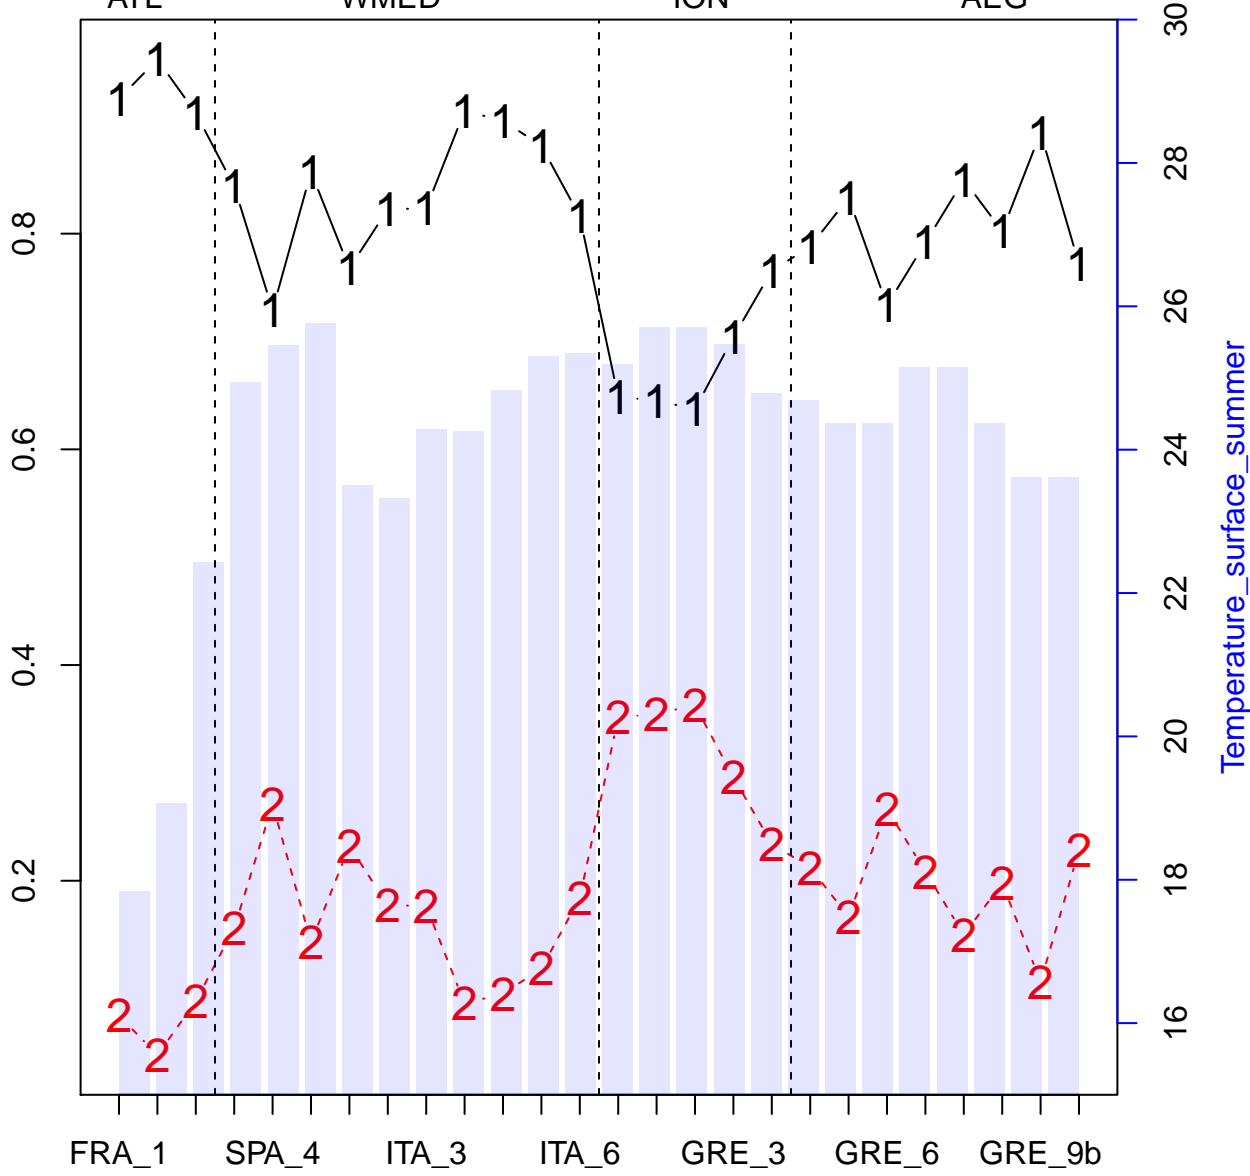

OL

# SNP 13518\_71

ATL

WMED

ION

AEG

allele frequency

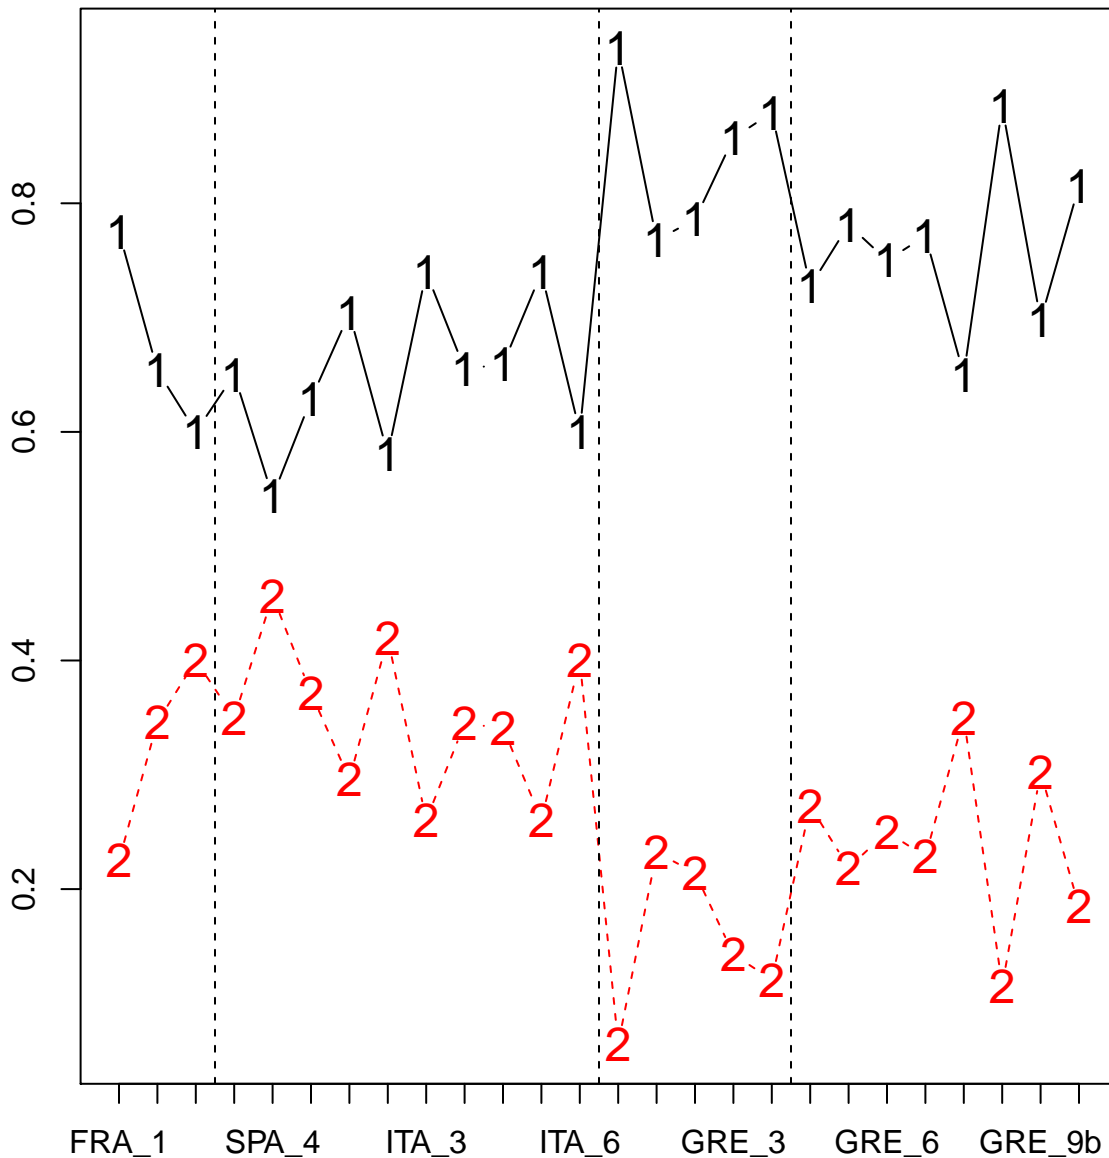

OL

### SNP 8150\_73

ATL

WMED

ION

AEG

allele frequency

1.0  
0.8  
0.6  
0.4  
0.2  
0.0

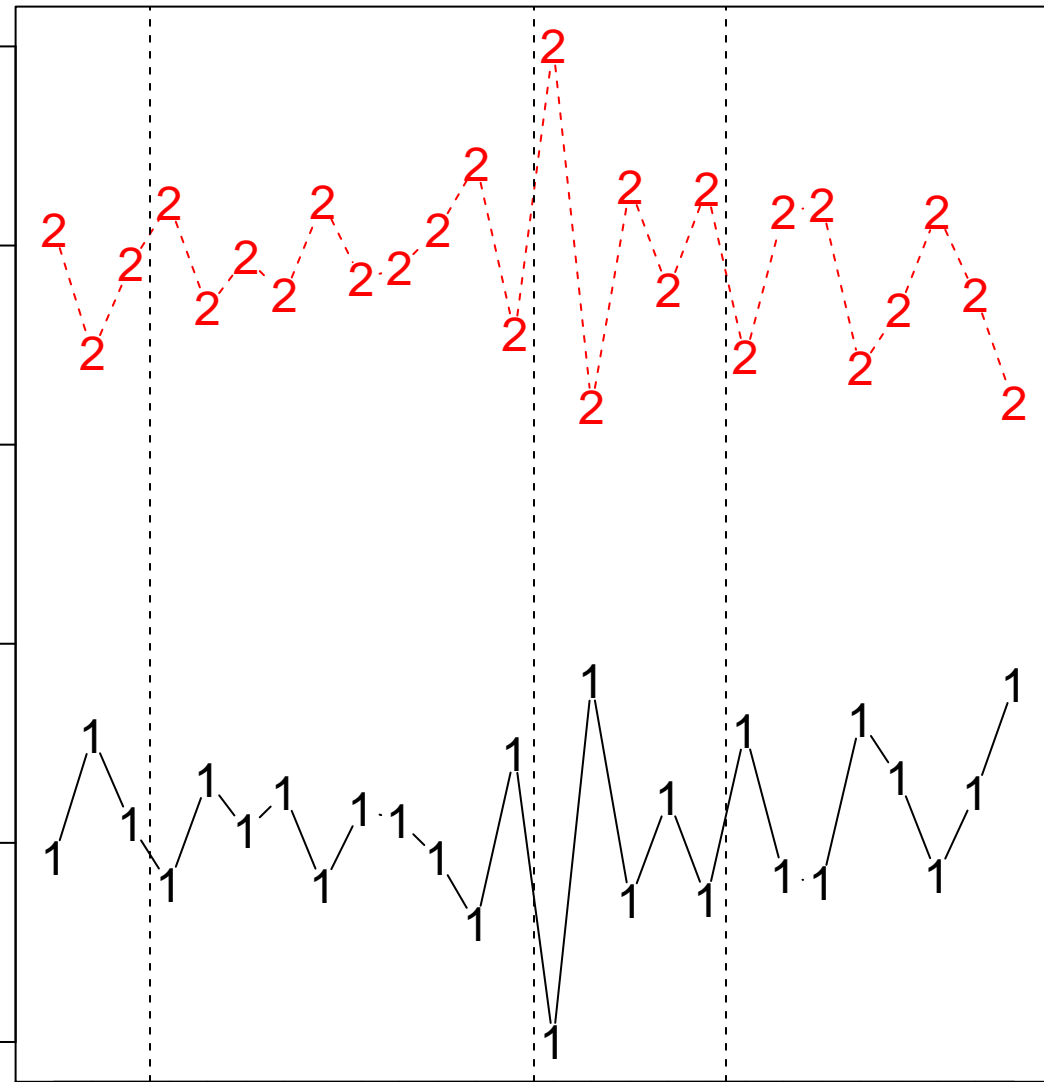

FRA\_1

SPA\_4

ITA\_3

ITA\_6

GRE\_3

GRE\_6

GRE\_9b



OL

### SNP 12615\_64

ATL

WMED

ION

AEG

allele frequency

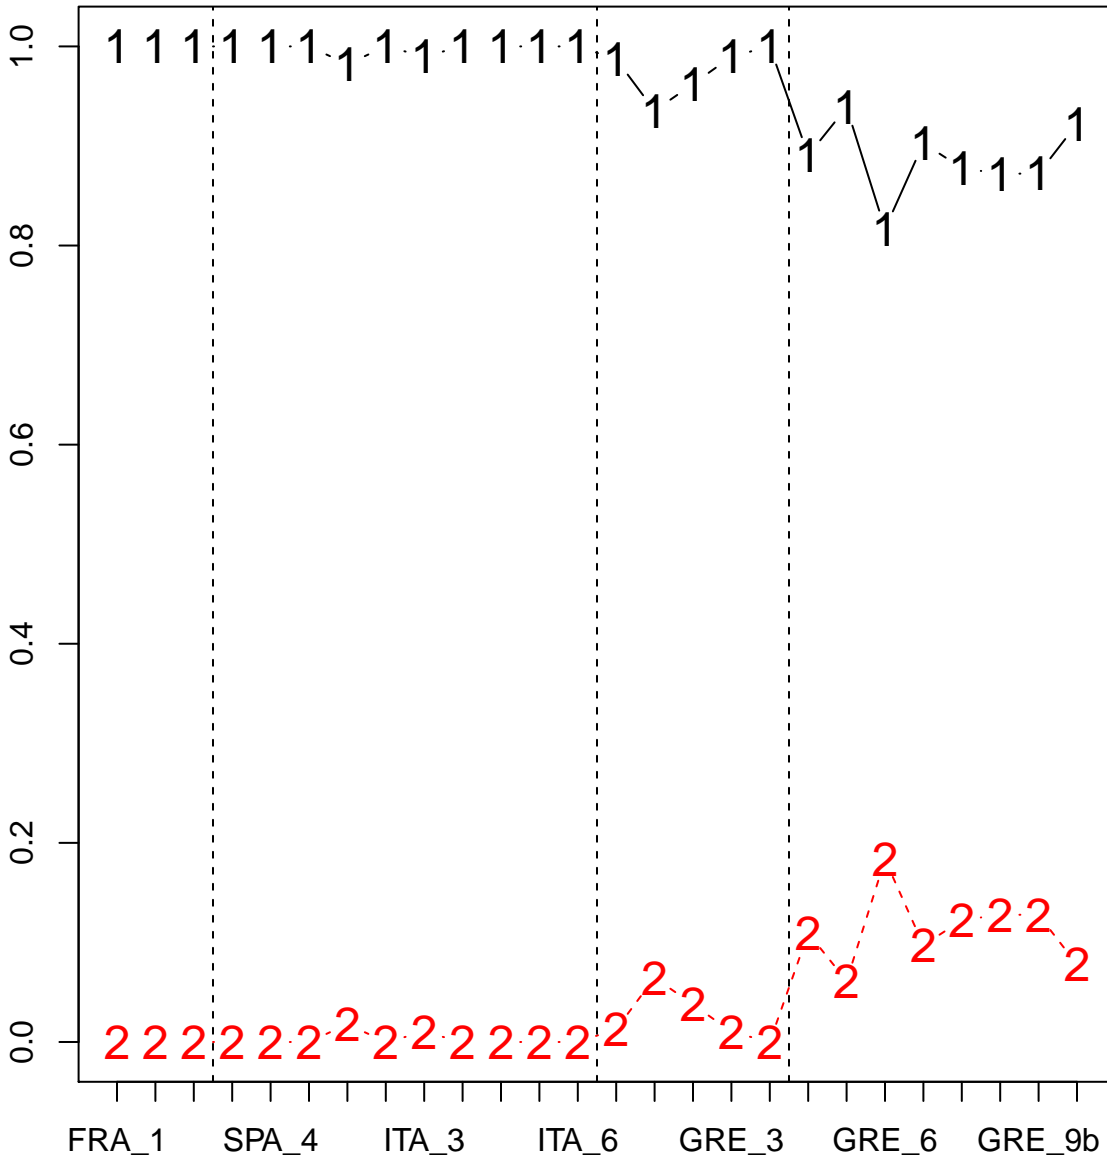

OL

# SNP 11878\_40

ATL

WMED

ION

AEG

allele frequency

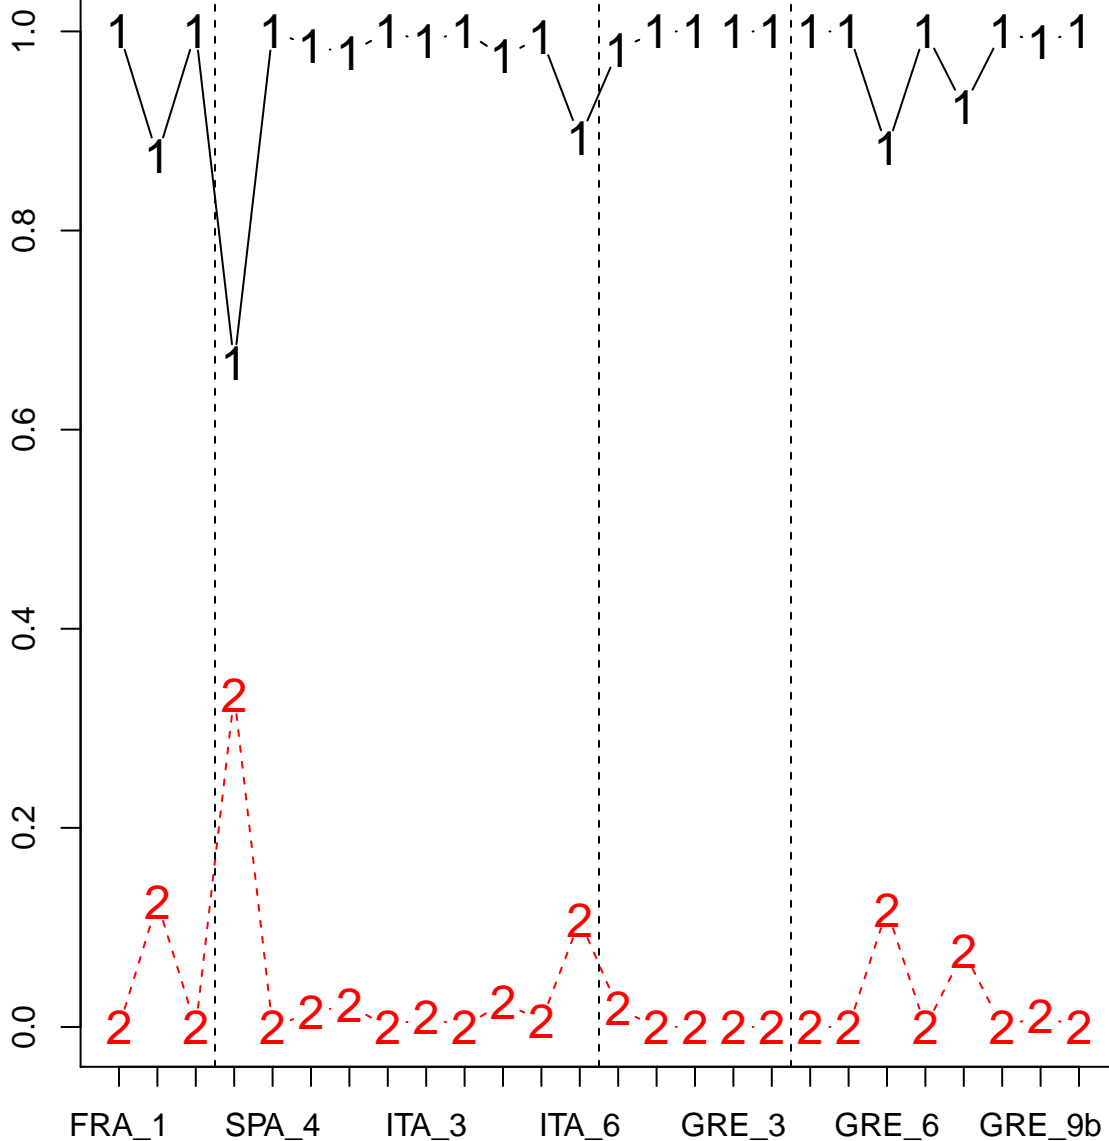

OL

# SNP 132\_61

ATL

WMED

ION

AEG

allele frequency

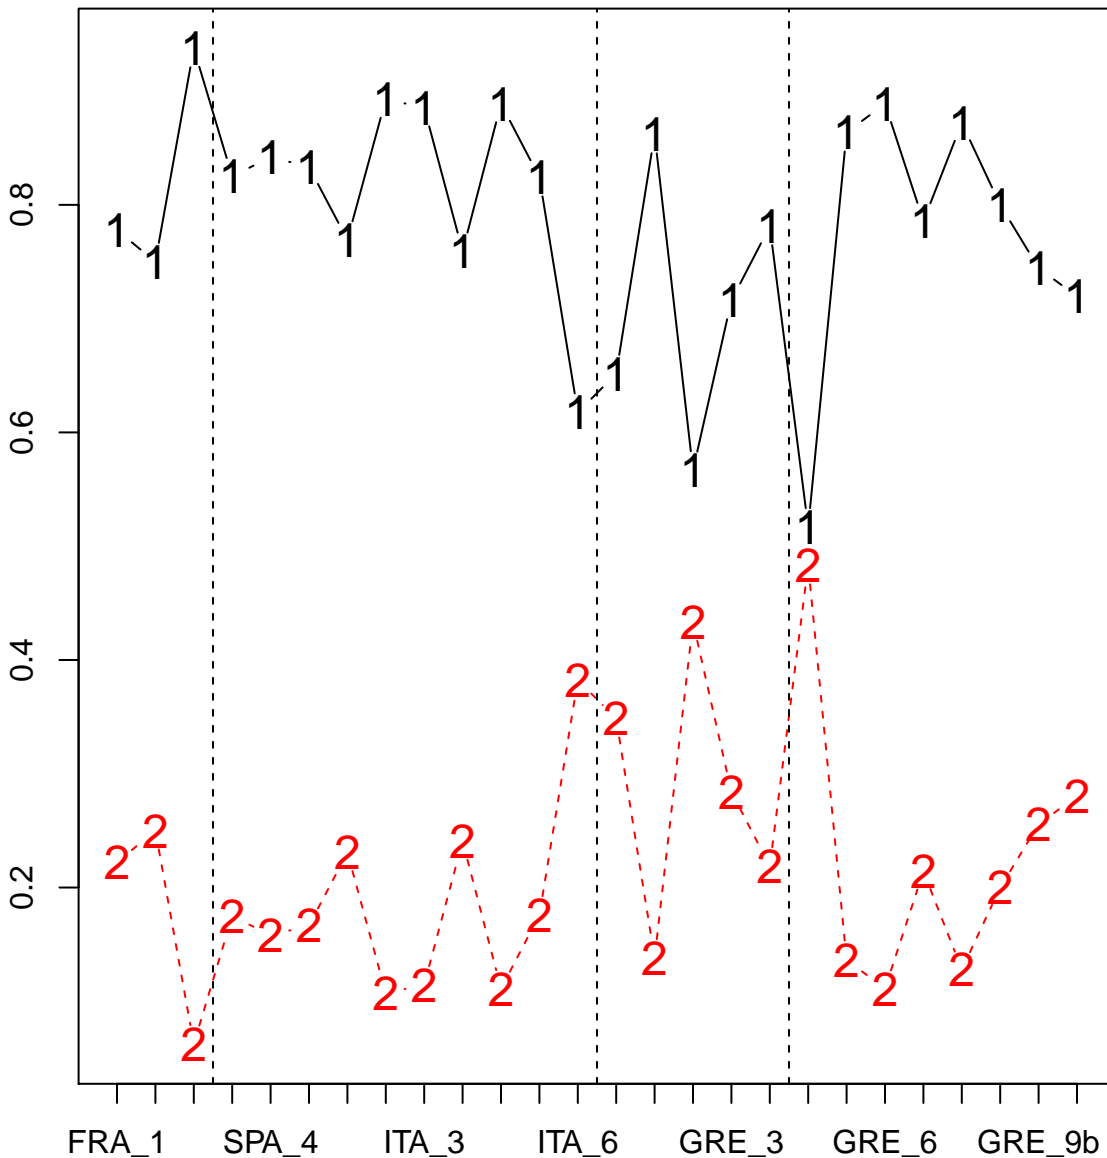

OL

# SNP 270\_23

ATL

WMED

ION

AEG

allele frequency

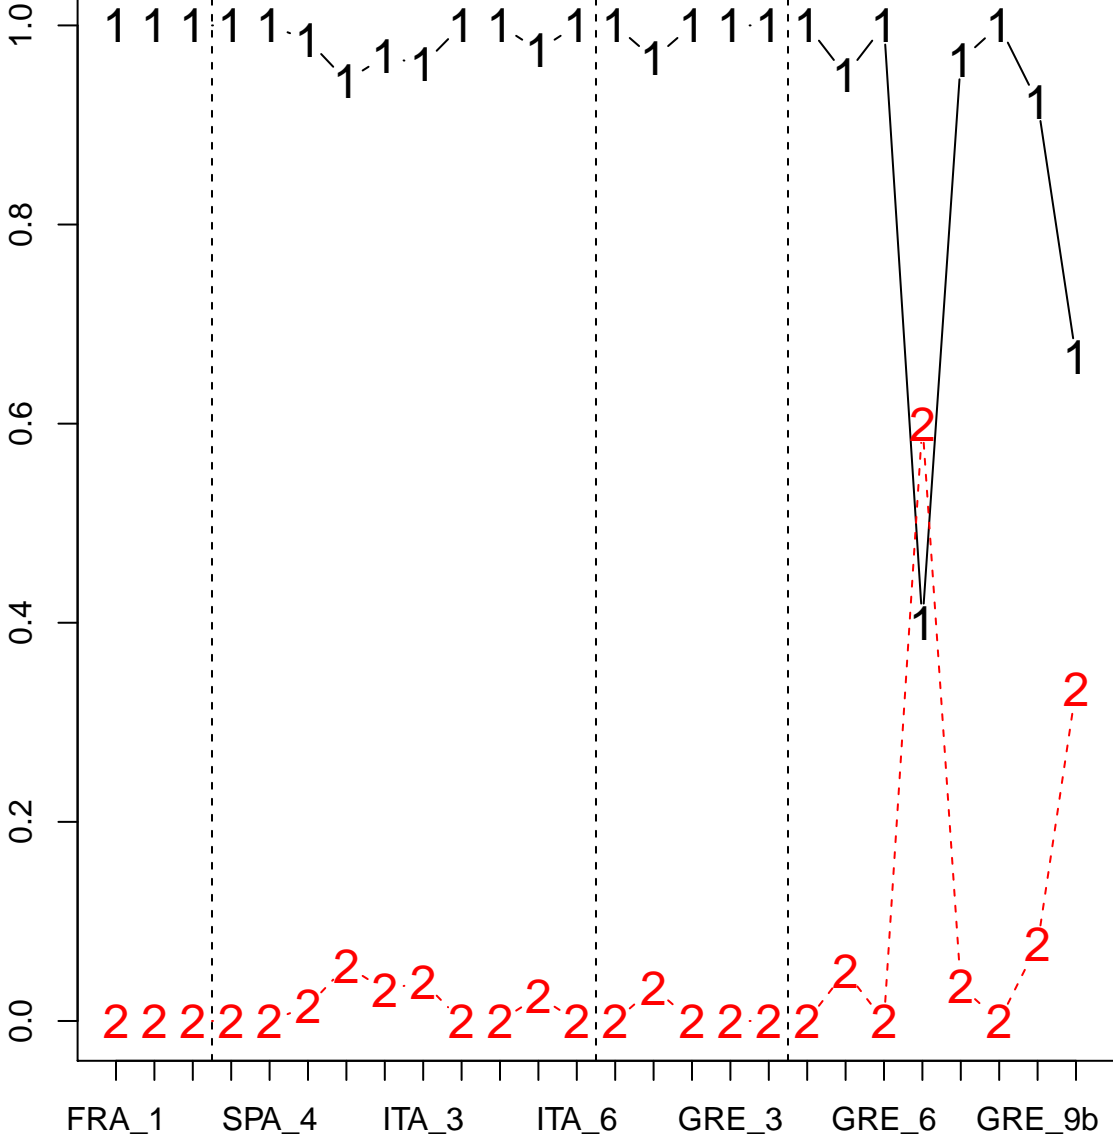

OL

# SNP 10524\_58

ATL

WMED

ION

AEG

allele frequency

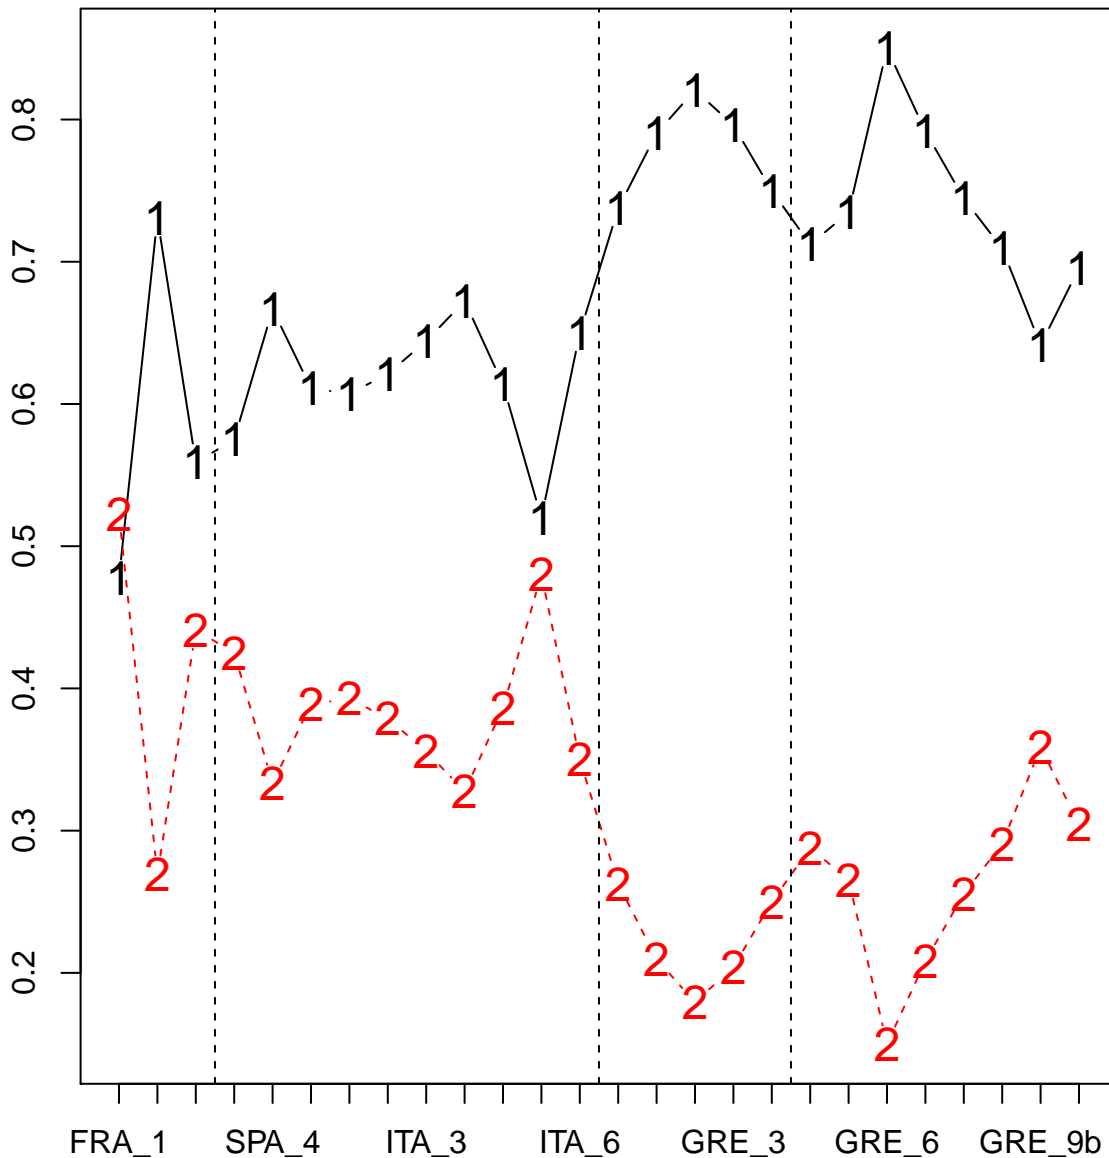

OL

# SNP 13129\_86

ATL

WMED

ION

AEG

allele frequency

0.7  
0.6  
0.5  
0.4  
0.3

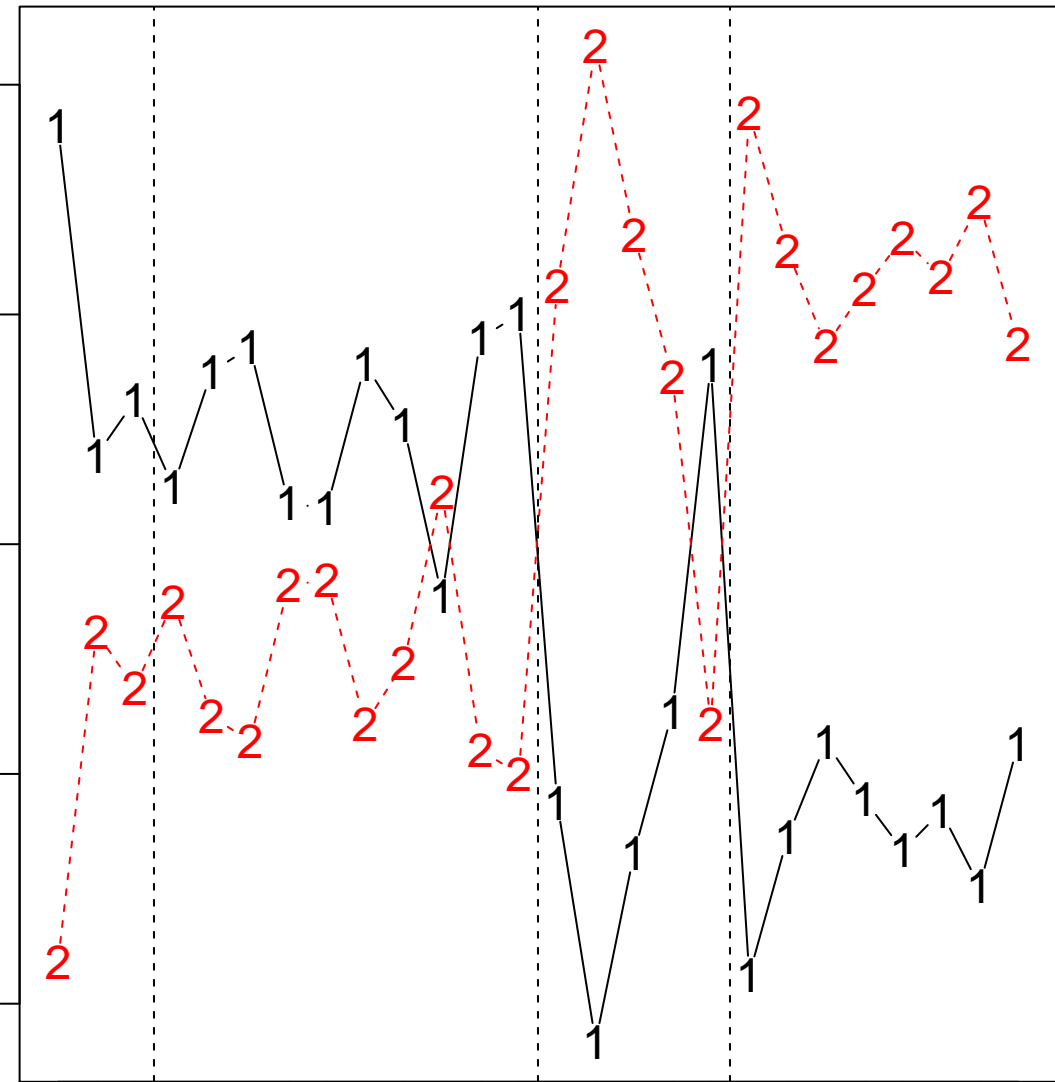

FRA\_1 SPA\_4 ITA\_3 ITA\_6 GRE\_3 GRE\_6 GRE\_9b

OL

### SNP 60\_69

ATL

WMED

ION

AEG

allele frequency

0.8  
0.6  
0.4  
0.2

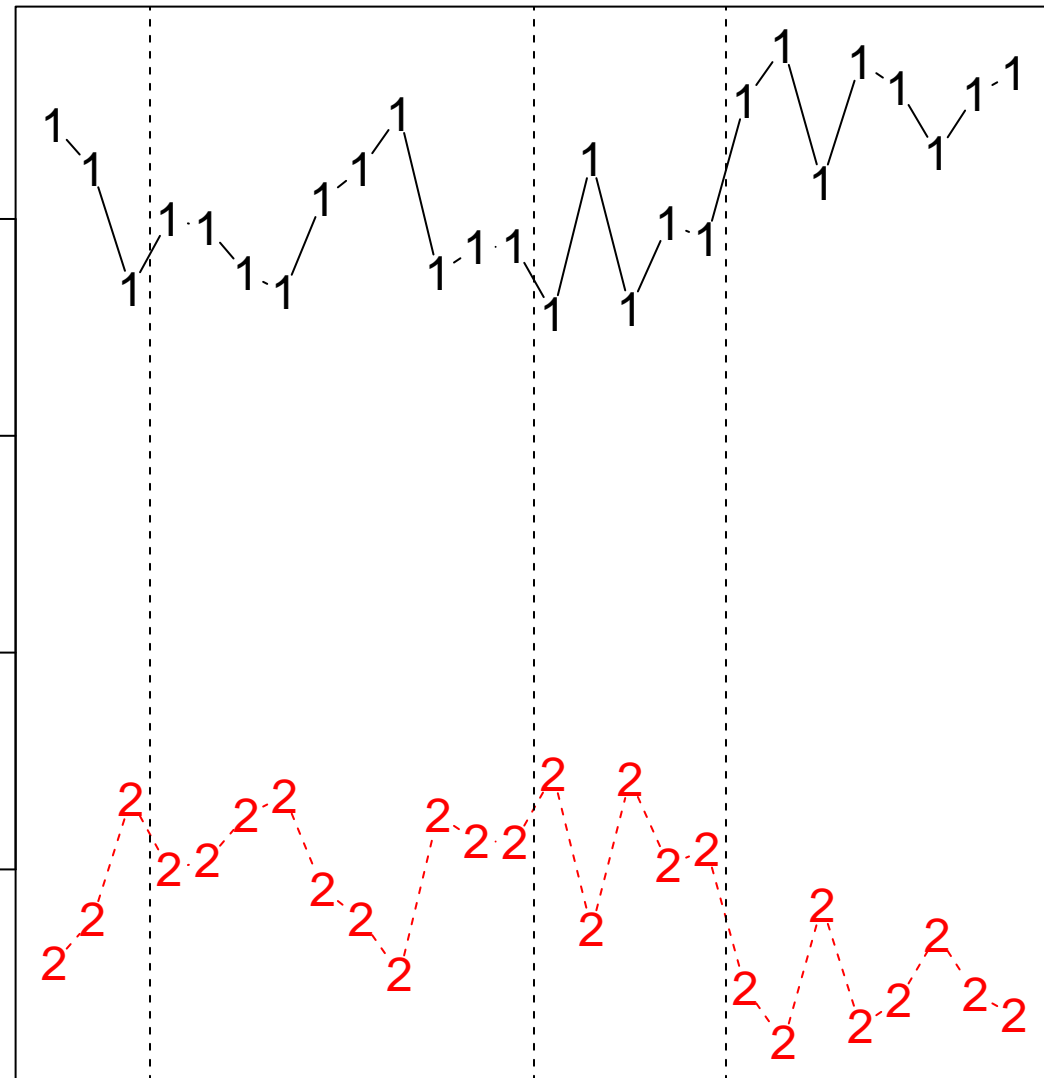

FRA\_1

SPA\_4

ITA\_3

ITA\_6

GRE\_3

GRE\_6

GRE\_9b

OL\_4Clusters

SNP 7513\_19

ATL

WMED

ION

AEG

allele frequency

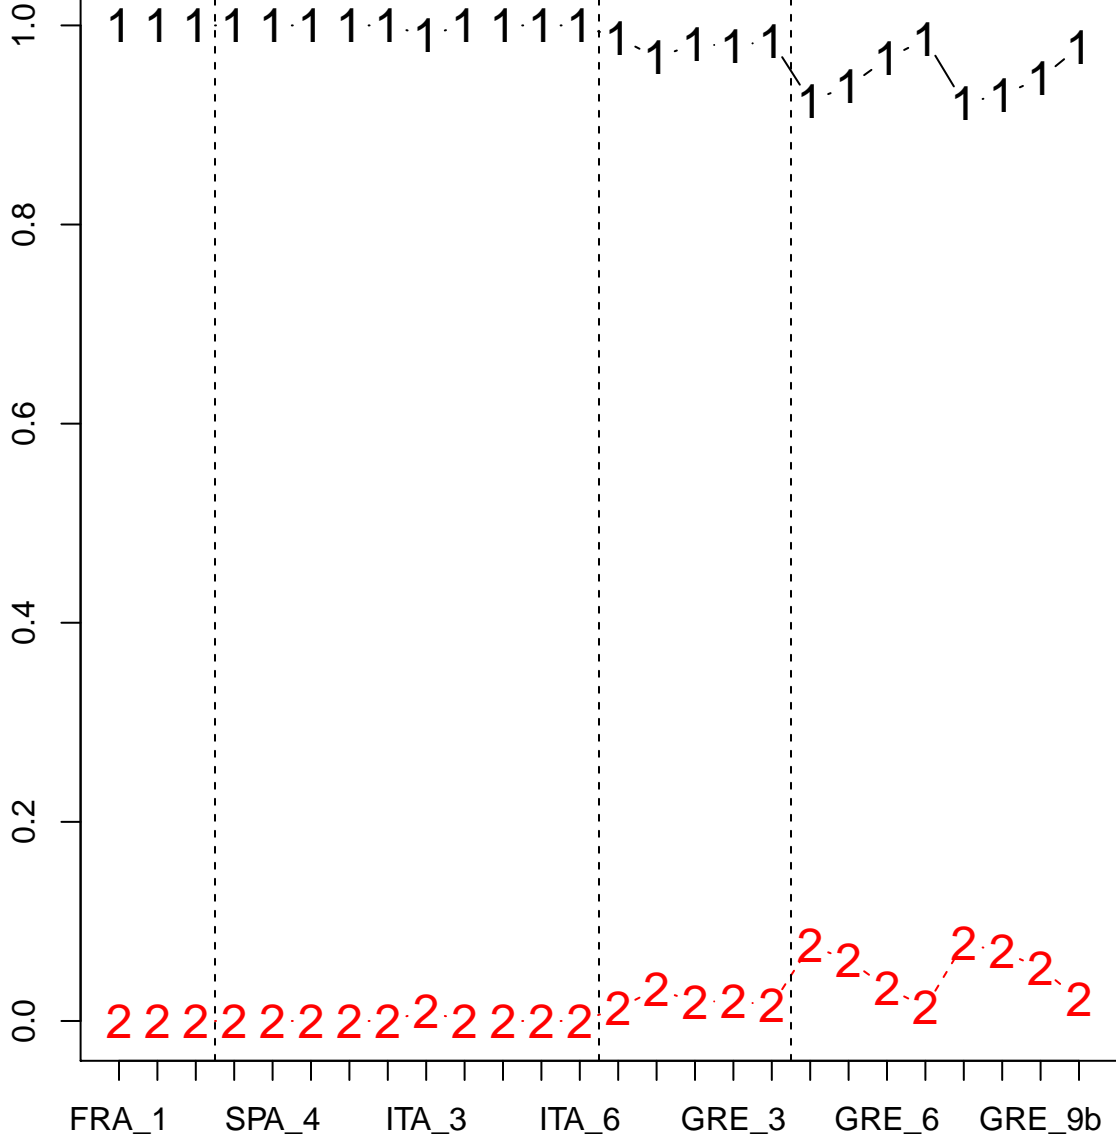



OL\_MED

# SNP 239\_15

ATL

WMED

ION

AEG

allele frequency

0.8

0.6

0.4

0.2

FRA\_1

SPA\_4

ITA\_3

ITA\_6

GRE\_3

GRE\_6

GRE\_9b

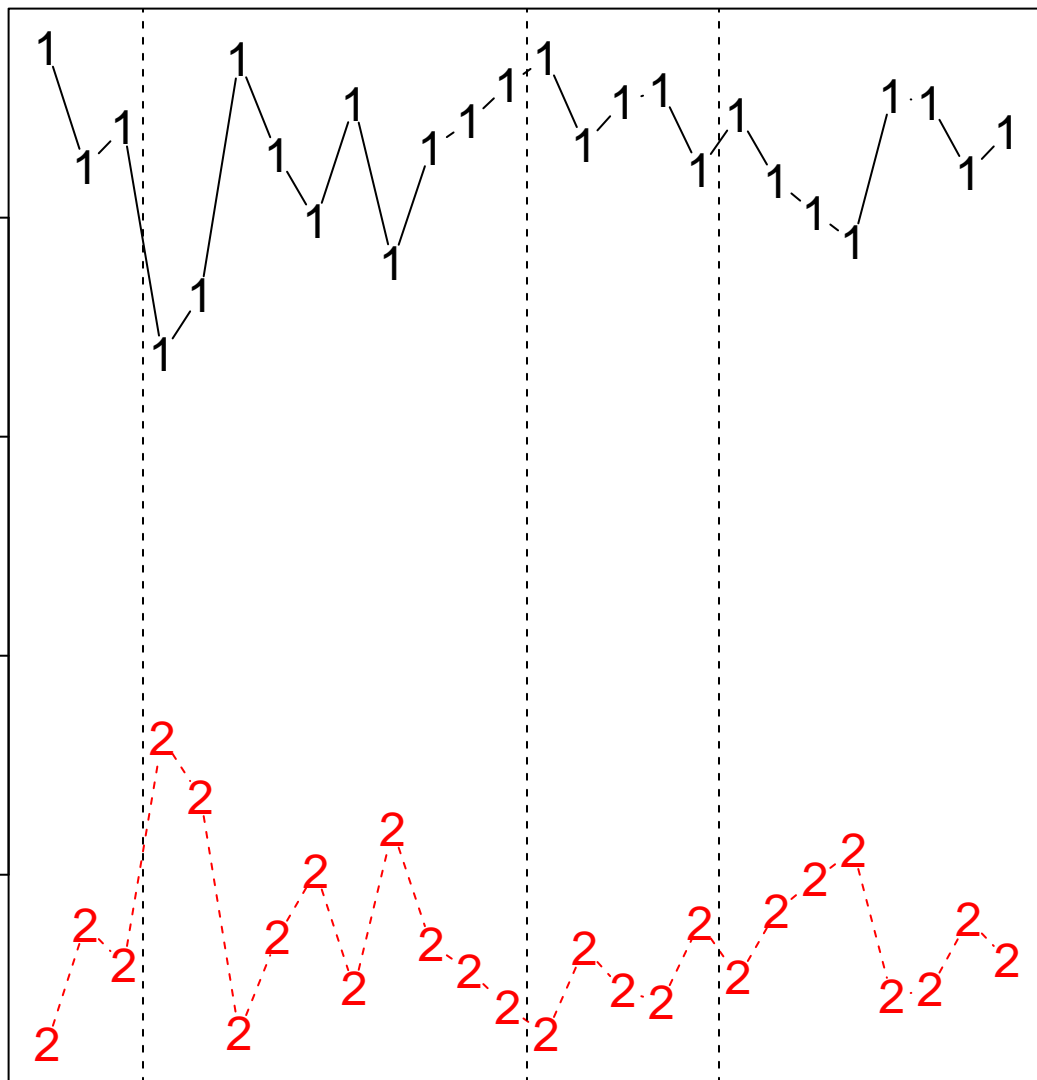

OL

# SNP 8727\_39

ATL

WMED

ION

AEG

allele frequency

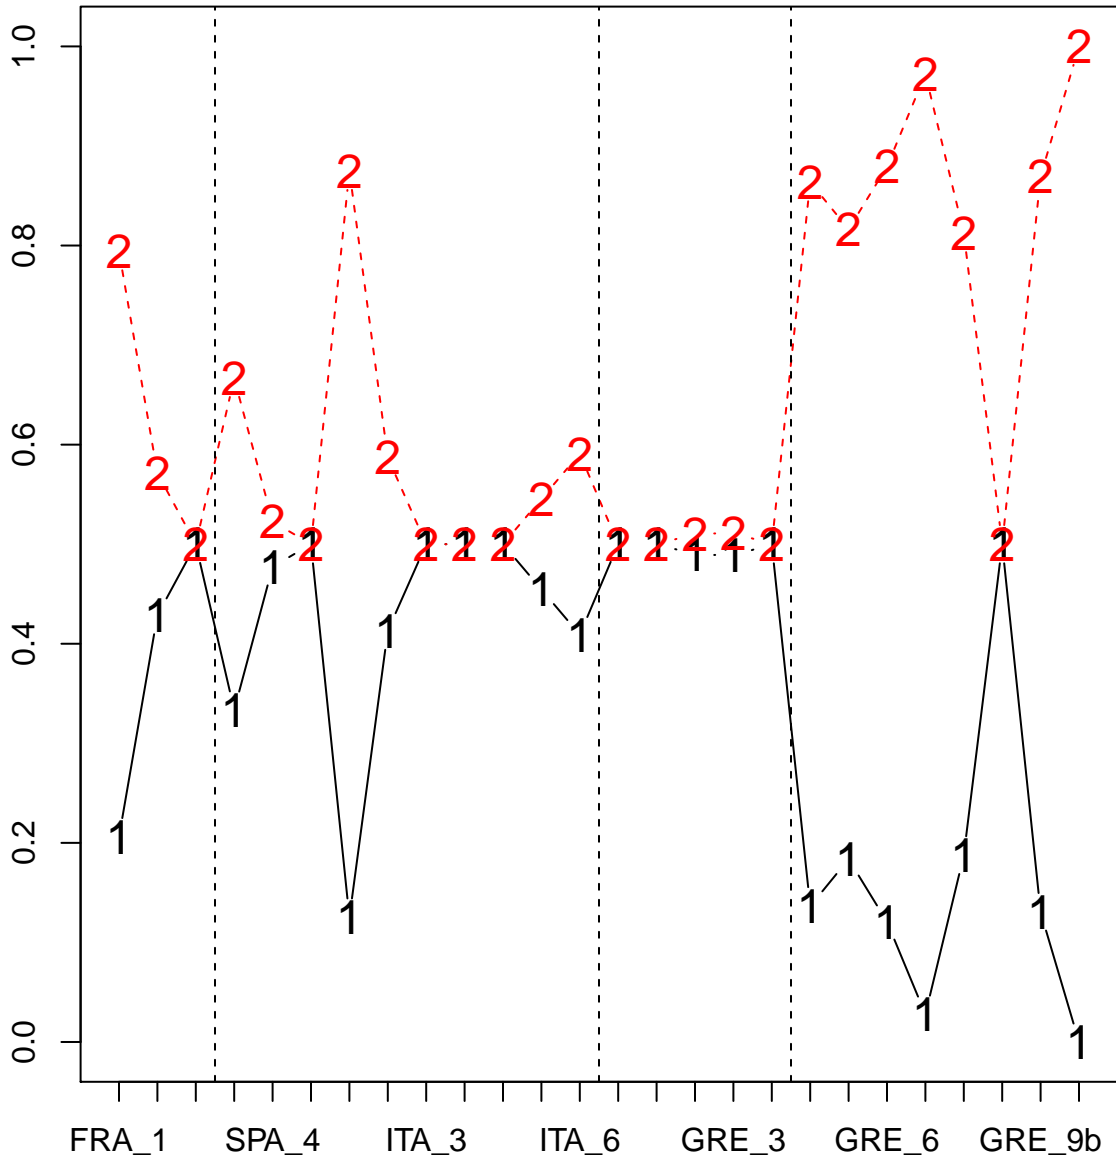

BayEnv

SNP 9438\_24

ATL

WMED

ION

AEG

allele frequency

Temperature\_surface\_summer

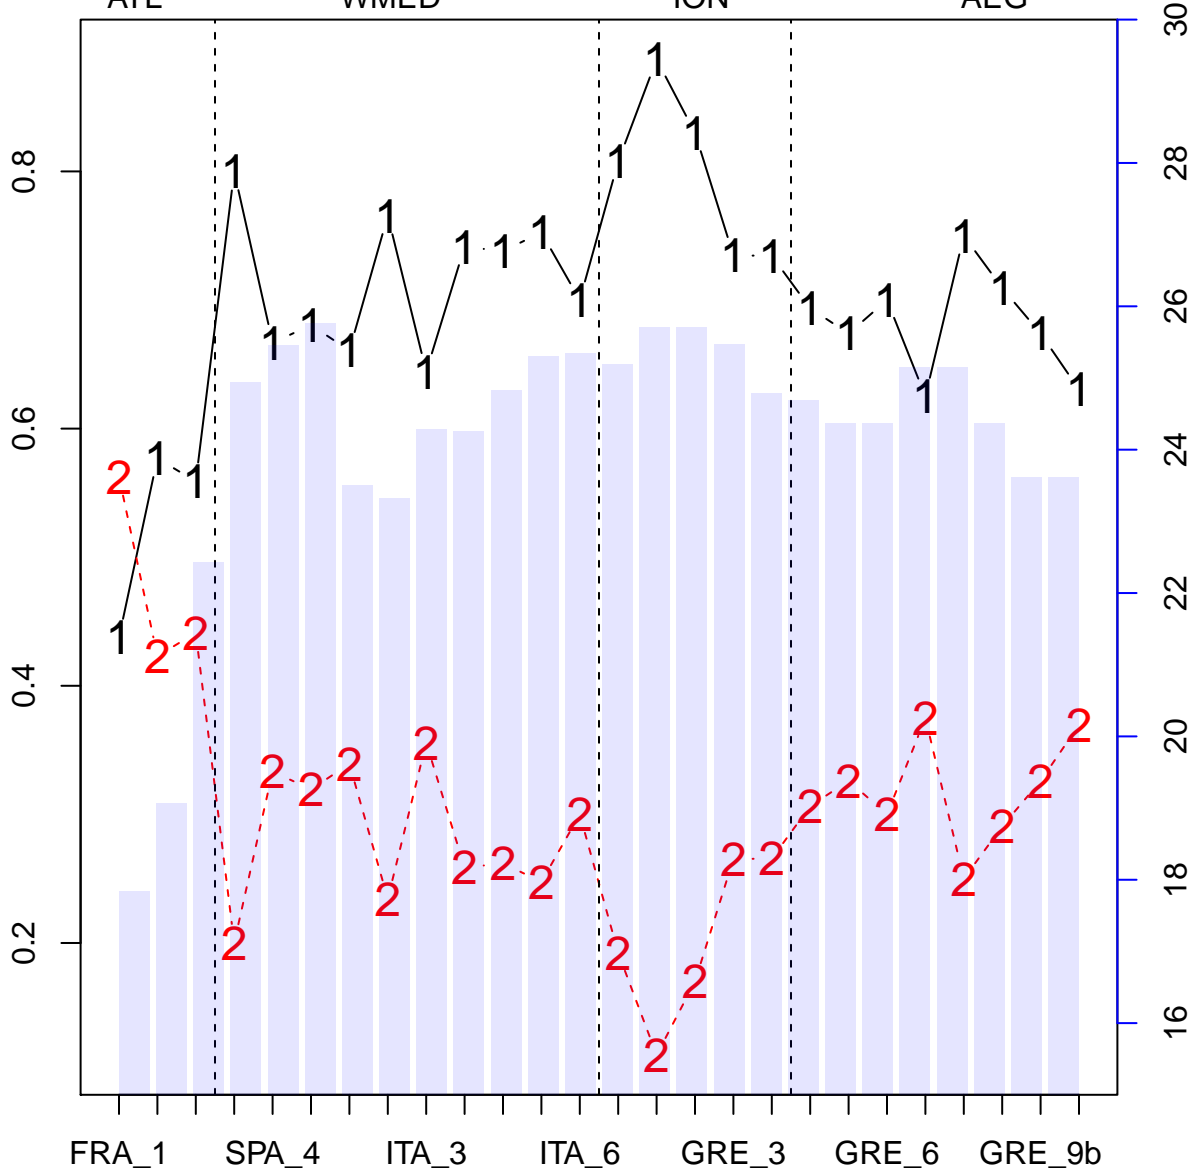

FRA\_1

SPA\_4

ITA\_3

ITA\_6

GRE\_3

GRE\_6

GRE\_9b

30

28

26

24

22

20

18

16

BayEnv

# SNP 13776\_28

ATL

WMED

ION

AEG

allele frequency

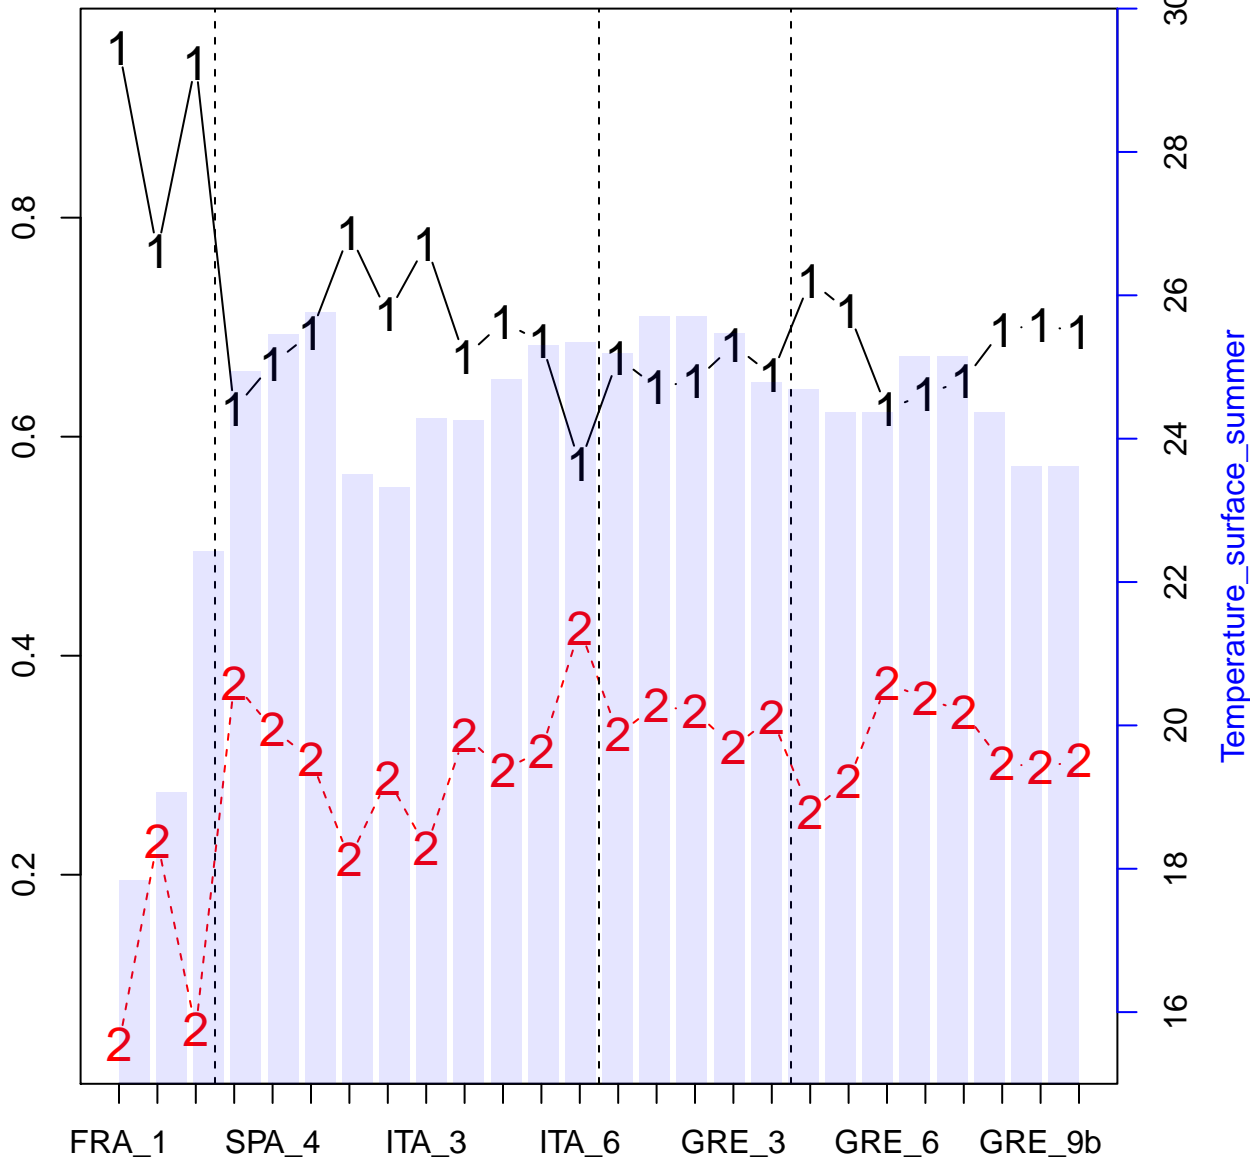

Temperature\_surface\_summer

BayEnv

### SNP 8913\_85

ATL

WMED

ION

AEG

allele frequency

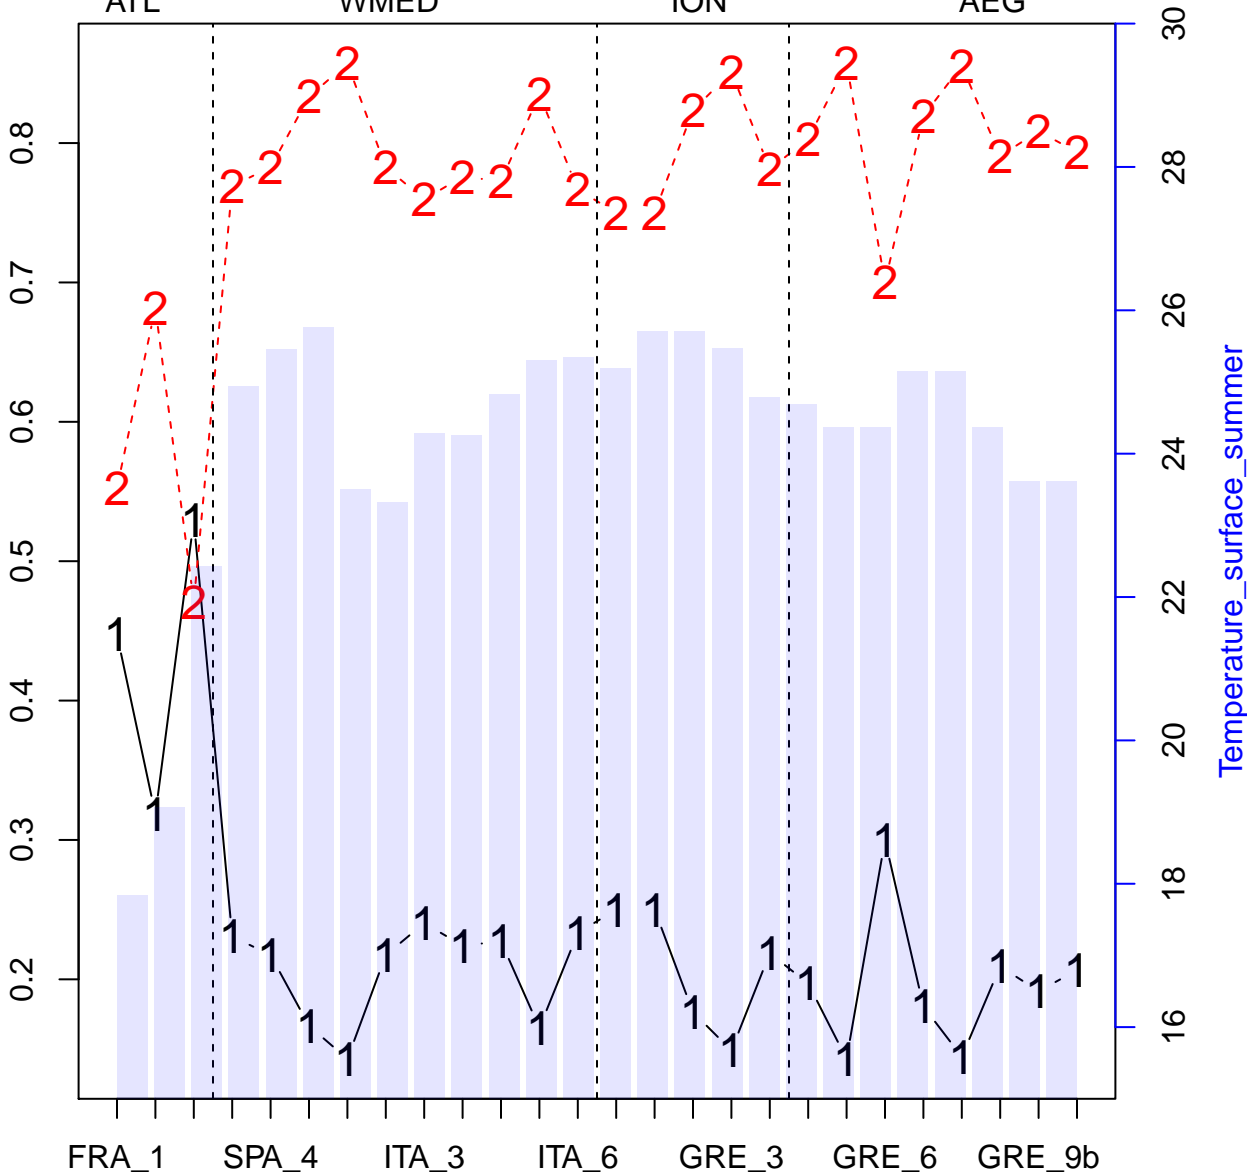

BayEnv

# SNP 3238\_7

ATL

WMED

ION

AEG

allele frequency

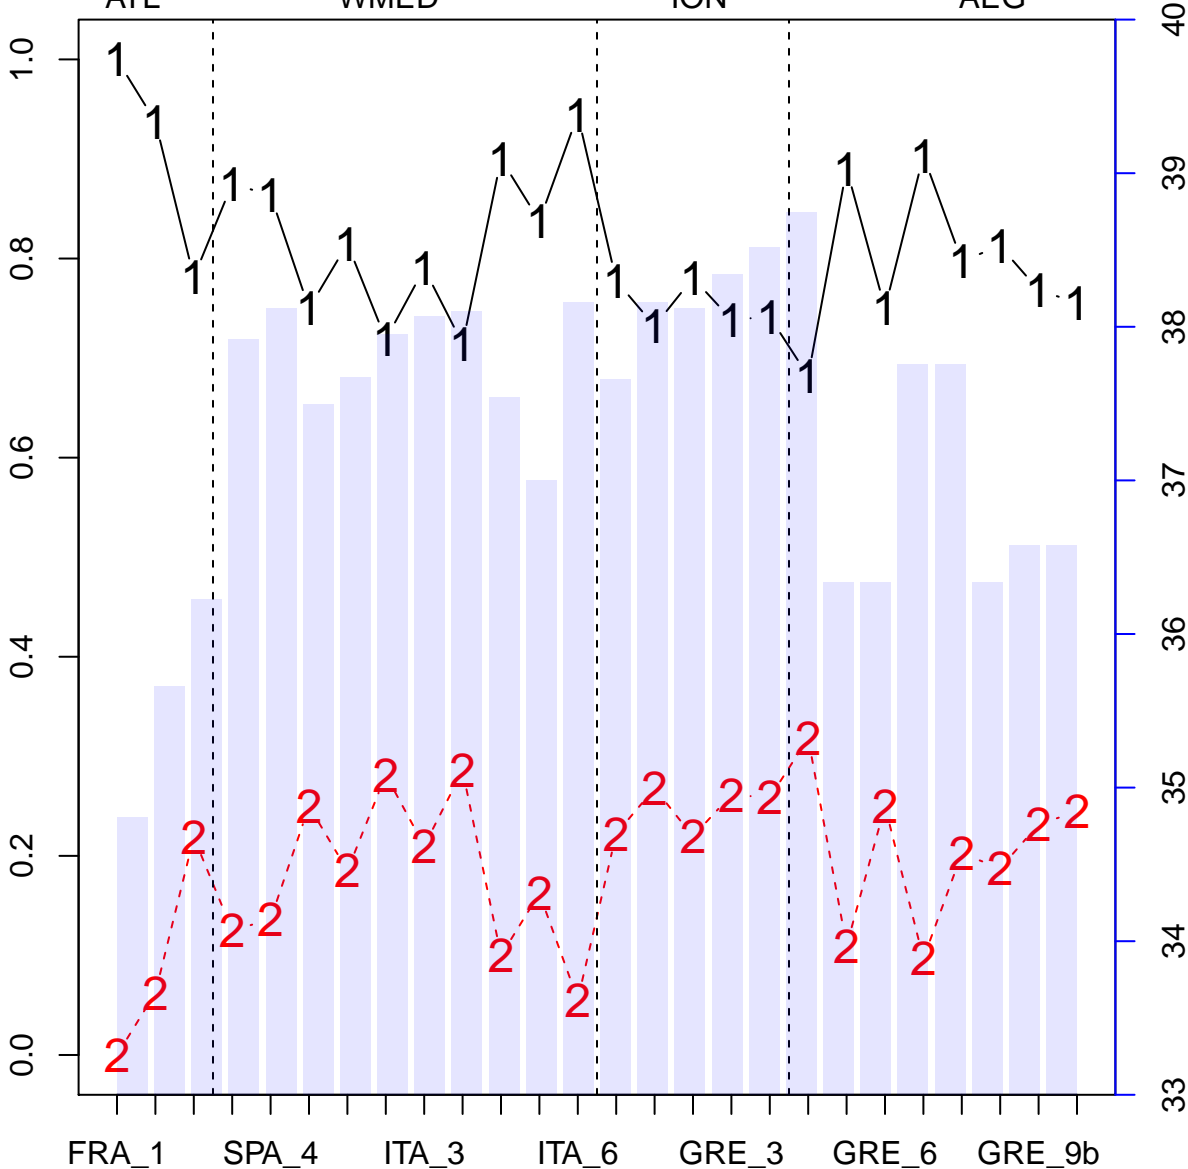

Salinity\_20m\_winter

BayEnv

SNP 8813\_23

ATL

WMED

ION

AEG

allele frequency

Salinity\_20m\_summer

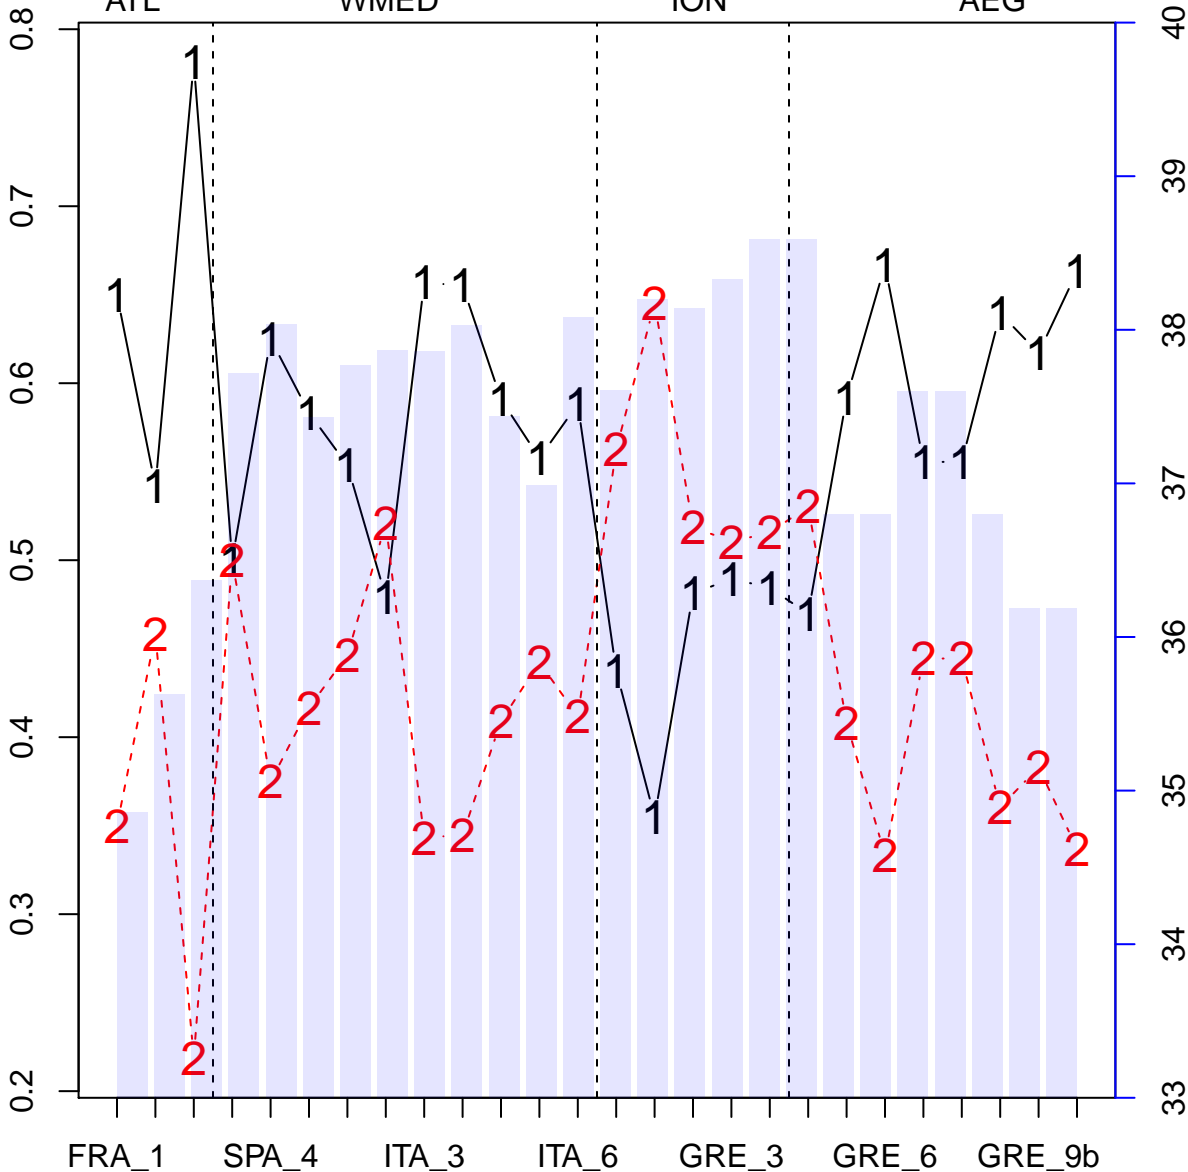

BayEnv

SNP 4455\_78

ATL

WMED

ION

AEG

allele frequency

Temperature\_surface\_winter

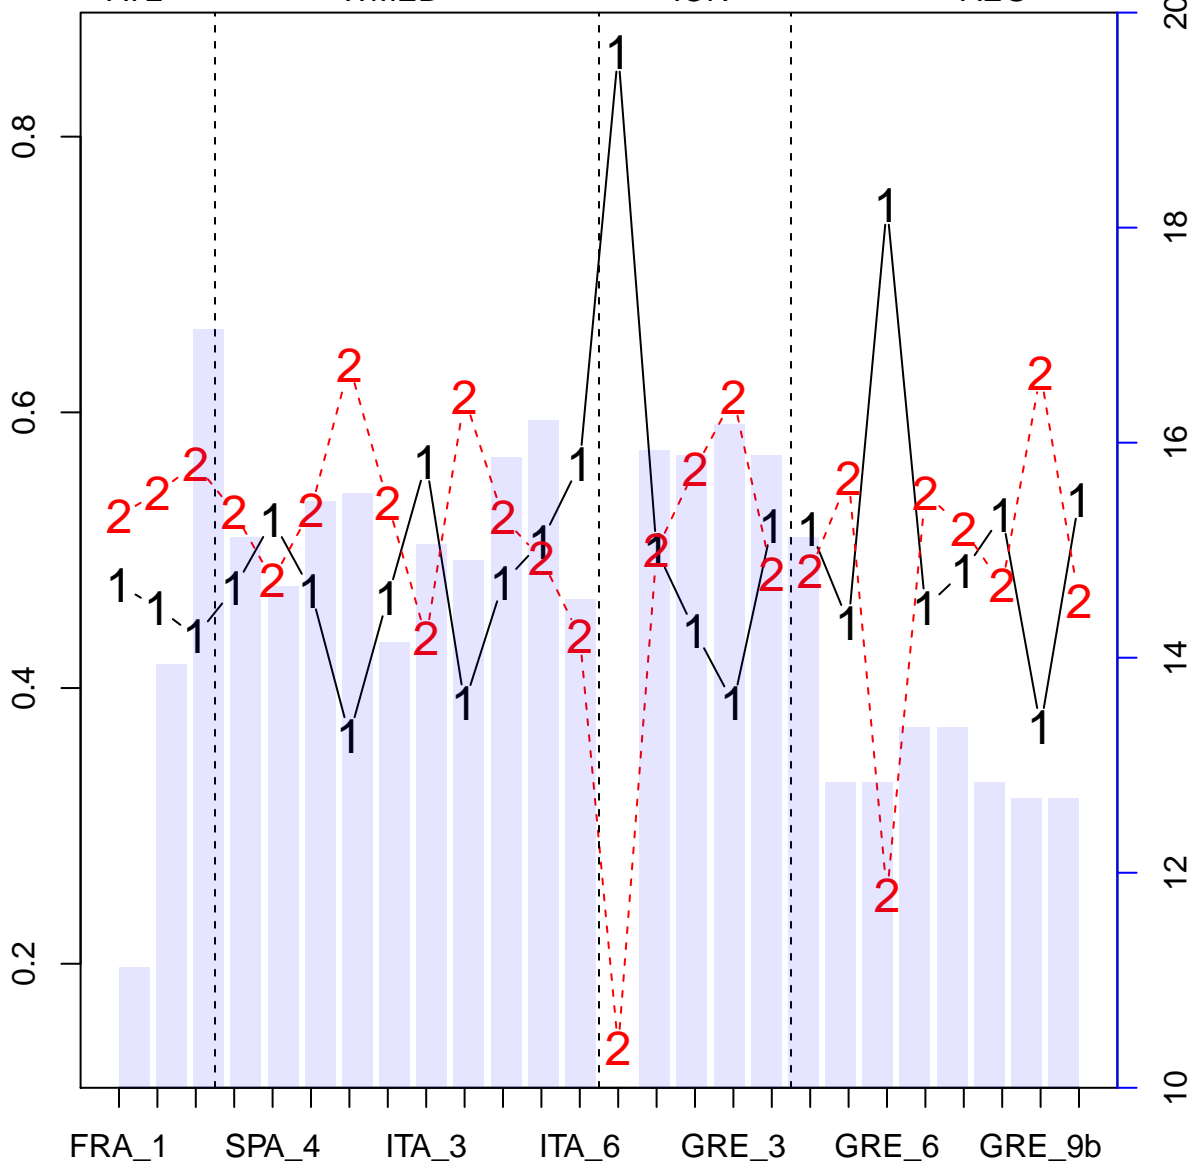

0.2  
0.4  
0.6  
0.8

10  
12  
14  
16  
18  
20

FRA\_1 SPA\_4 ITA\_3 ITA\_6 GRE\_3 GRE\_6 GRE\_9b



BayEnv

SNP 3614\_41

ATL

WMED

ION

AEG

allele frequency

Temperature\_20m\_summer

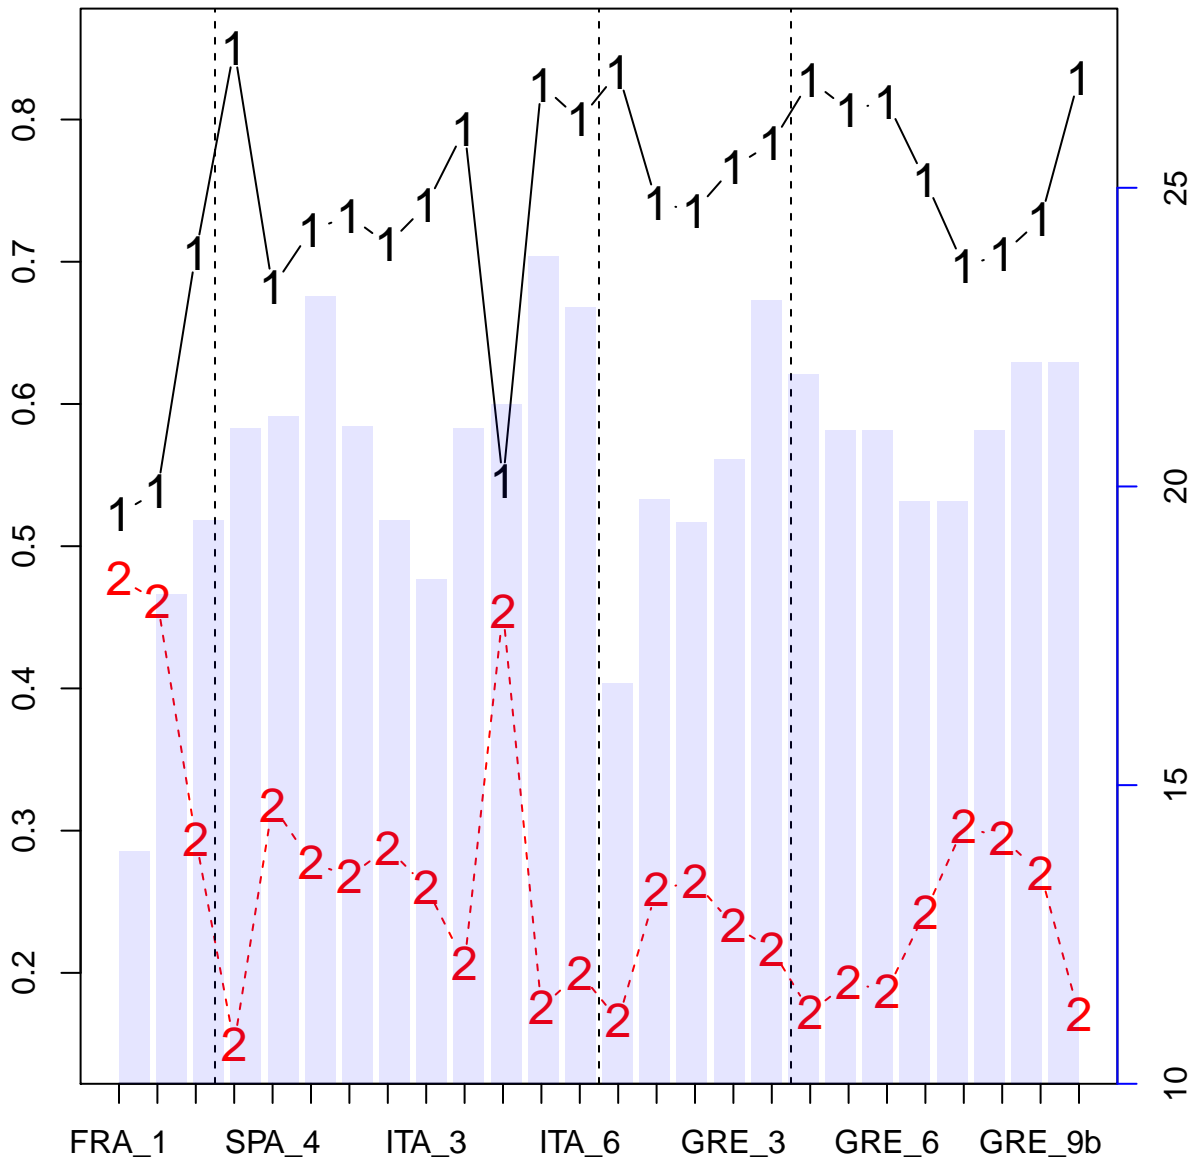

10

15

20

25

BayEnv

### SNP 4810\_70

ATL

WMED

ION

AEG

allele frequency

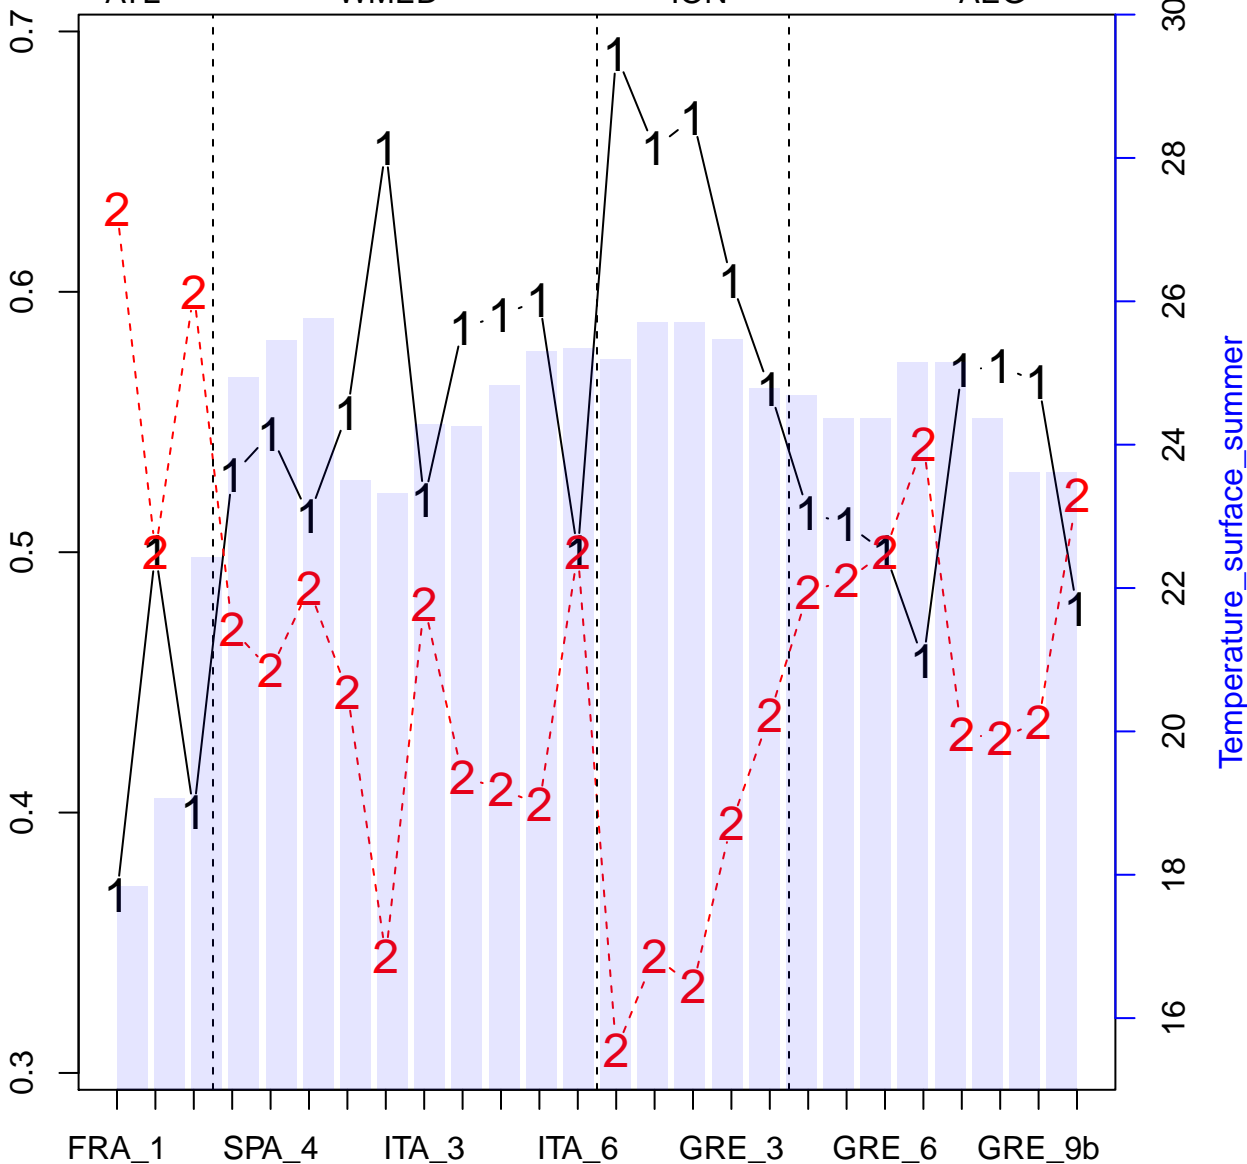

Temperature\_surface\_summer

BayEnv

### SNP 10473\_54

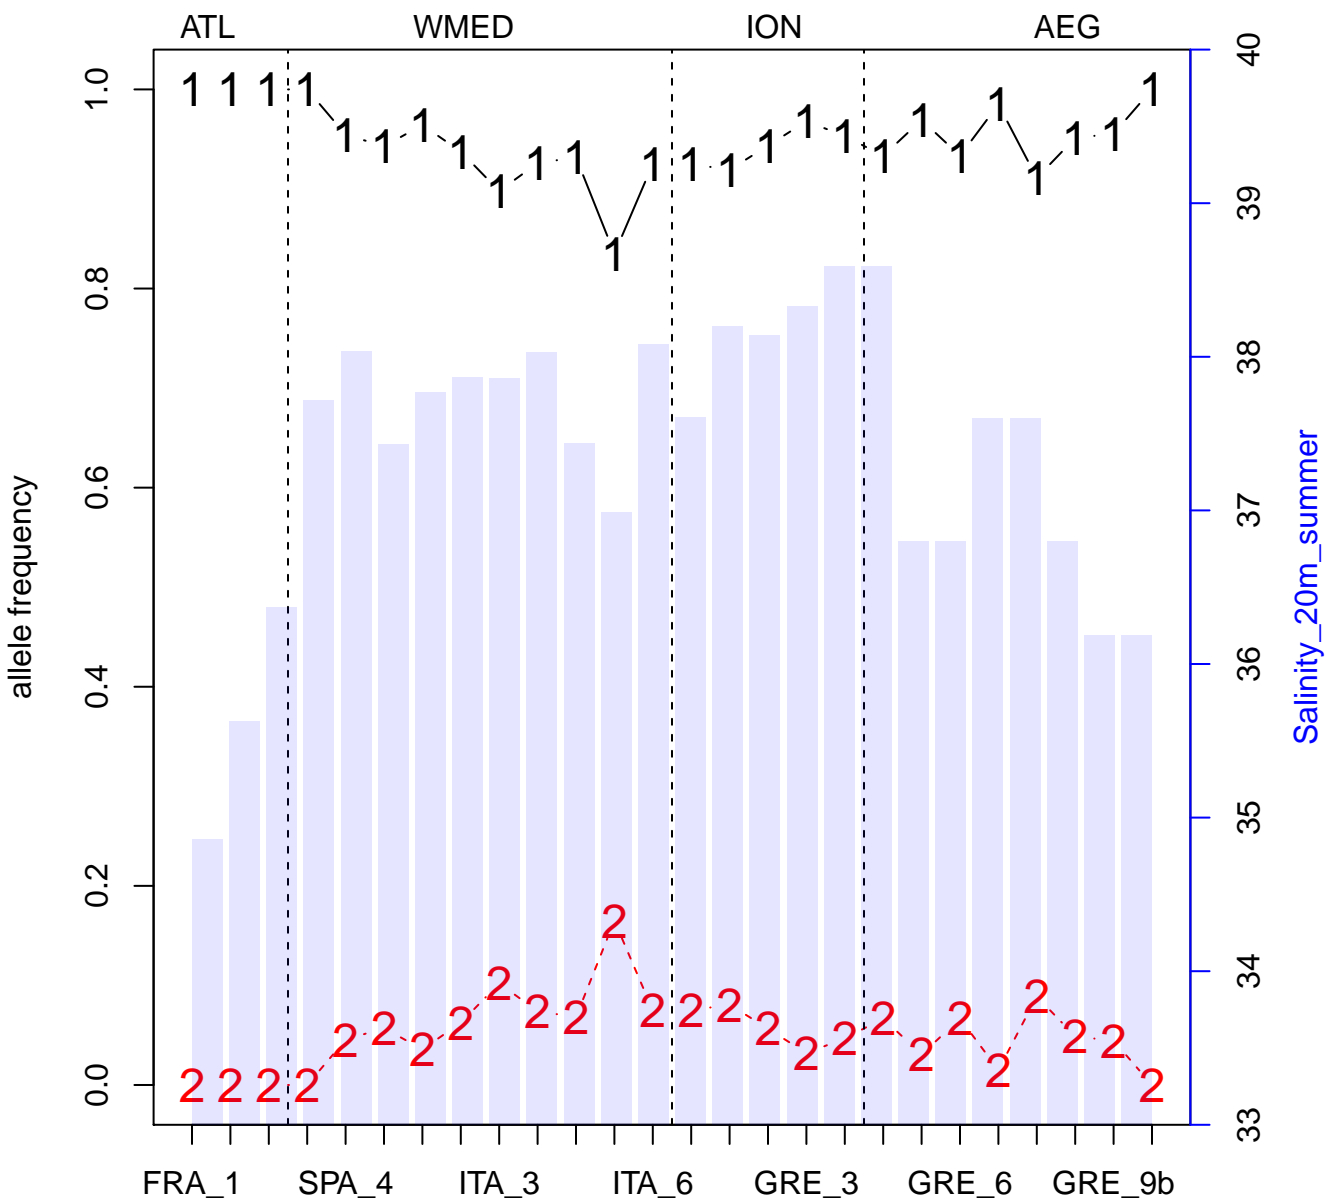

BayEnv

# SNP 13674\_61

ATL

WMED

ION

AEG

allele frequency

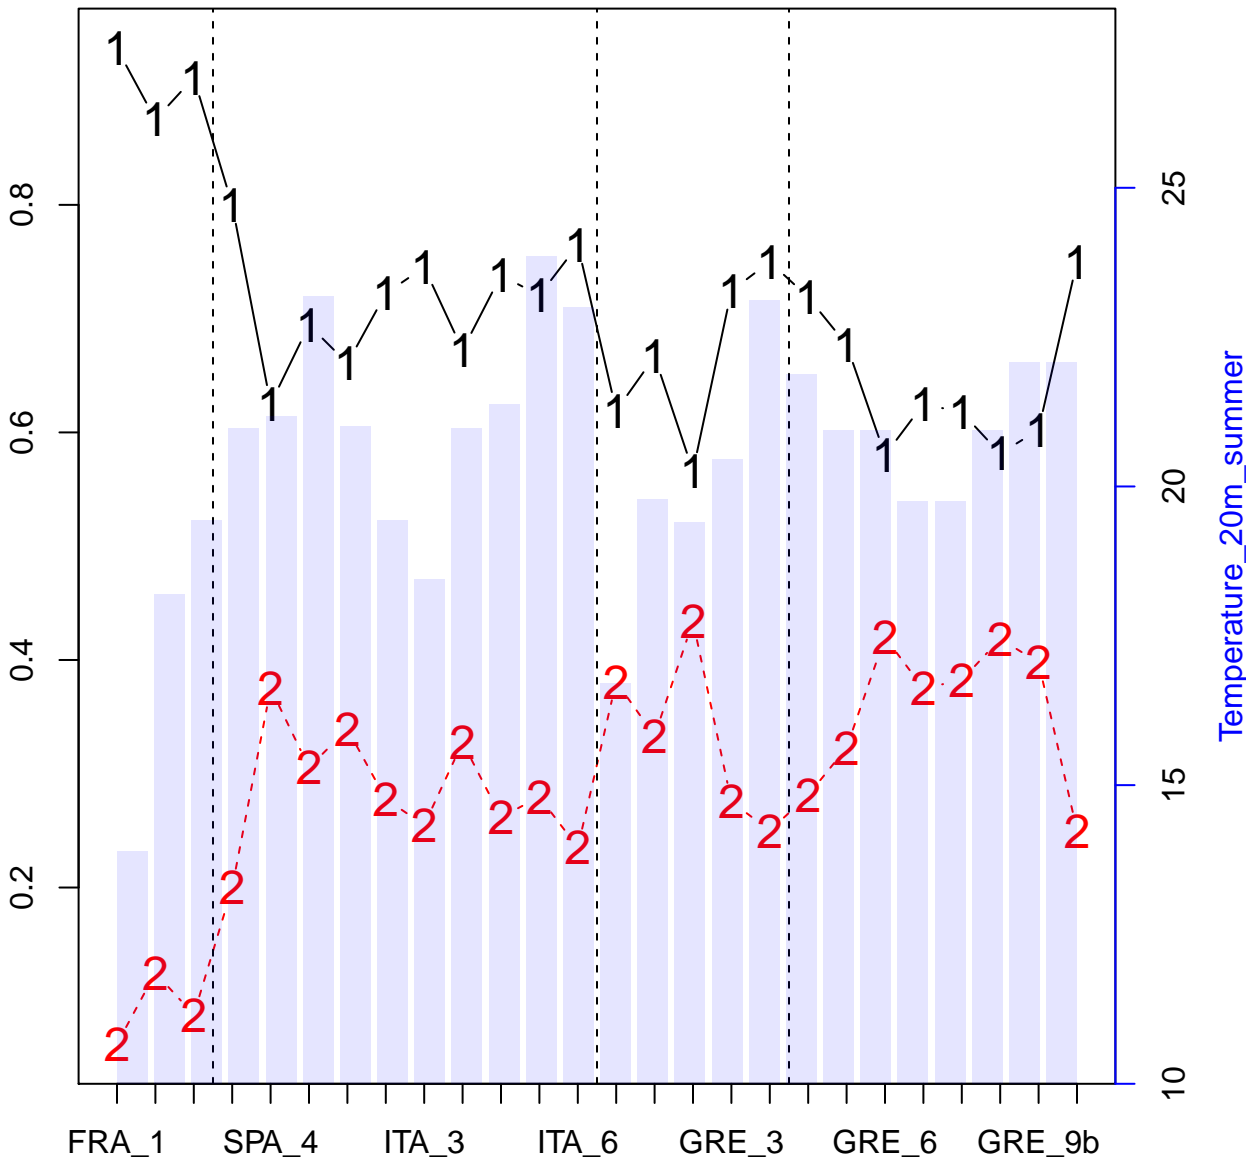

BayEnv

# SNP 598\_34

ATL

WMED

ION

AEG

allele frequency

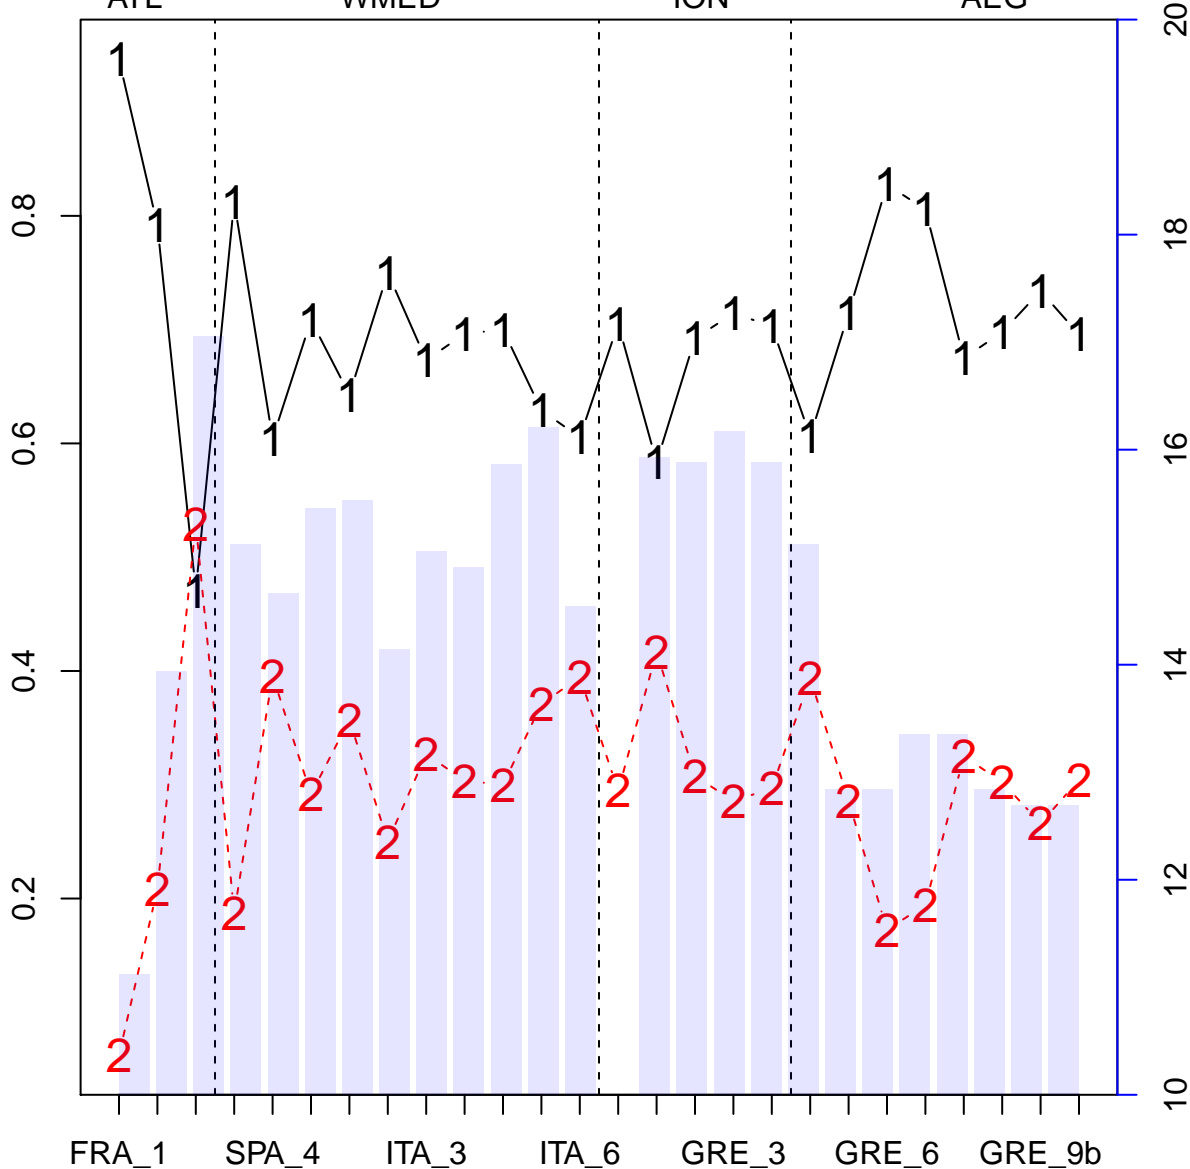

Temperature\_surface\_winter

BayEnv

# SNP 7325\_58

ATL

WMED

ION

AEG

allele frequency

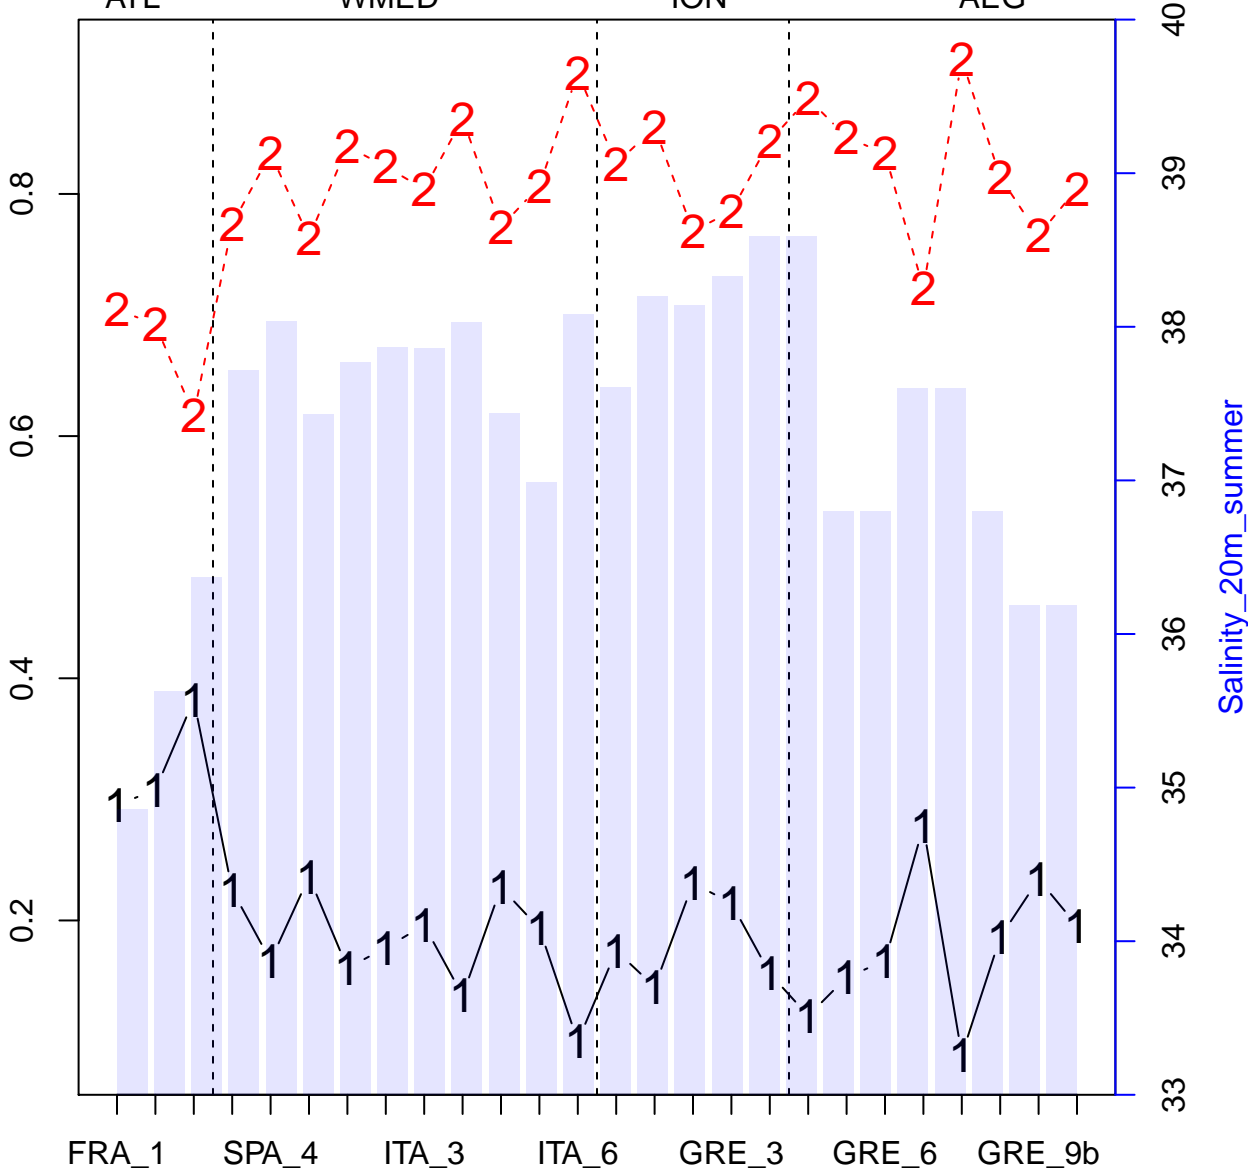

Salinity\_20m\_summer

BayEnv

# SNP 13398\_81

ATL

WMED

ION

AEG

allele frequency

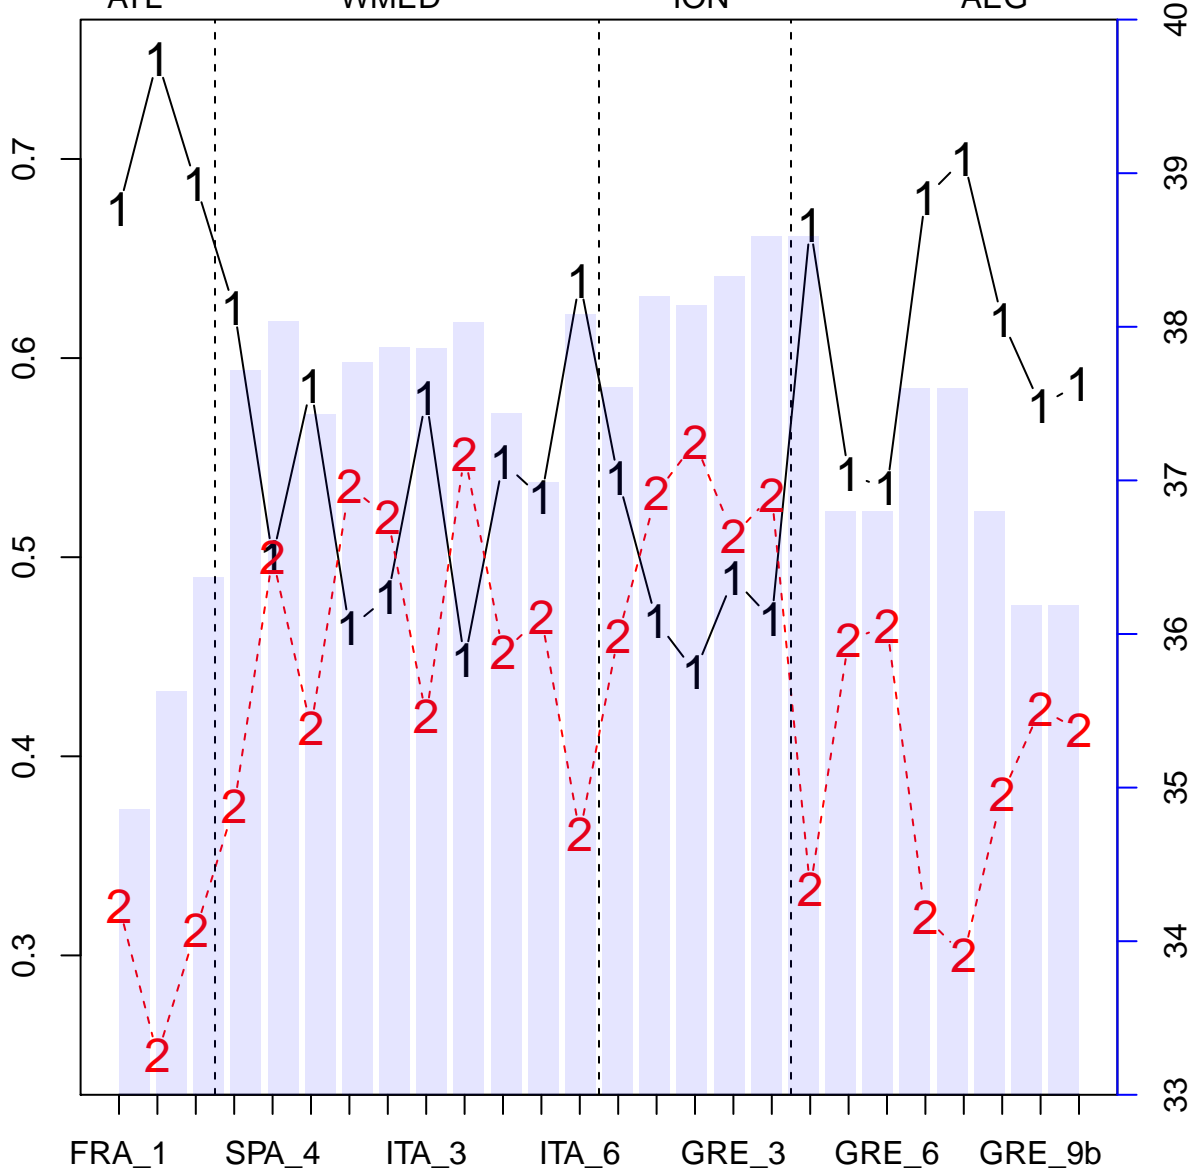

Salinity\_20m\_summer

40  
39  
38  
37  
36  
35  
34  
33

BayEnv

# SNP 5133\_78

ATL

WMED

ION

AEG

allele frequency

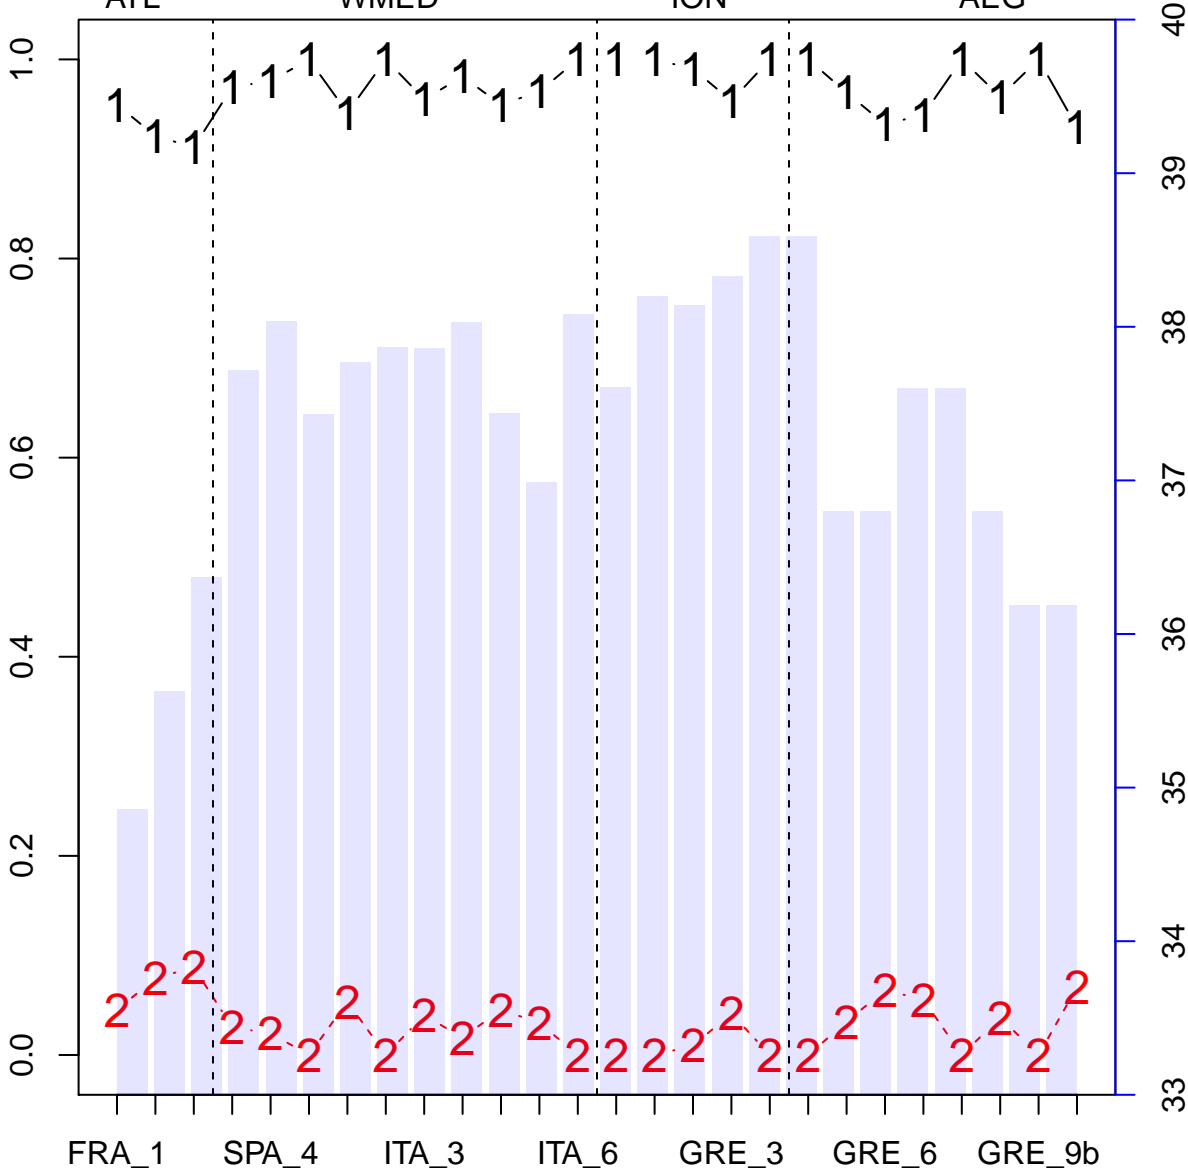



BayEnv

### SNP 4135\_65

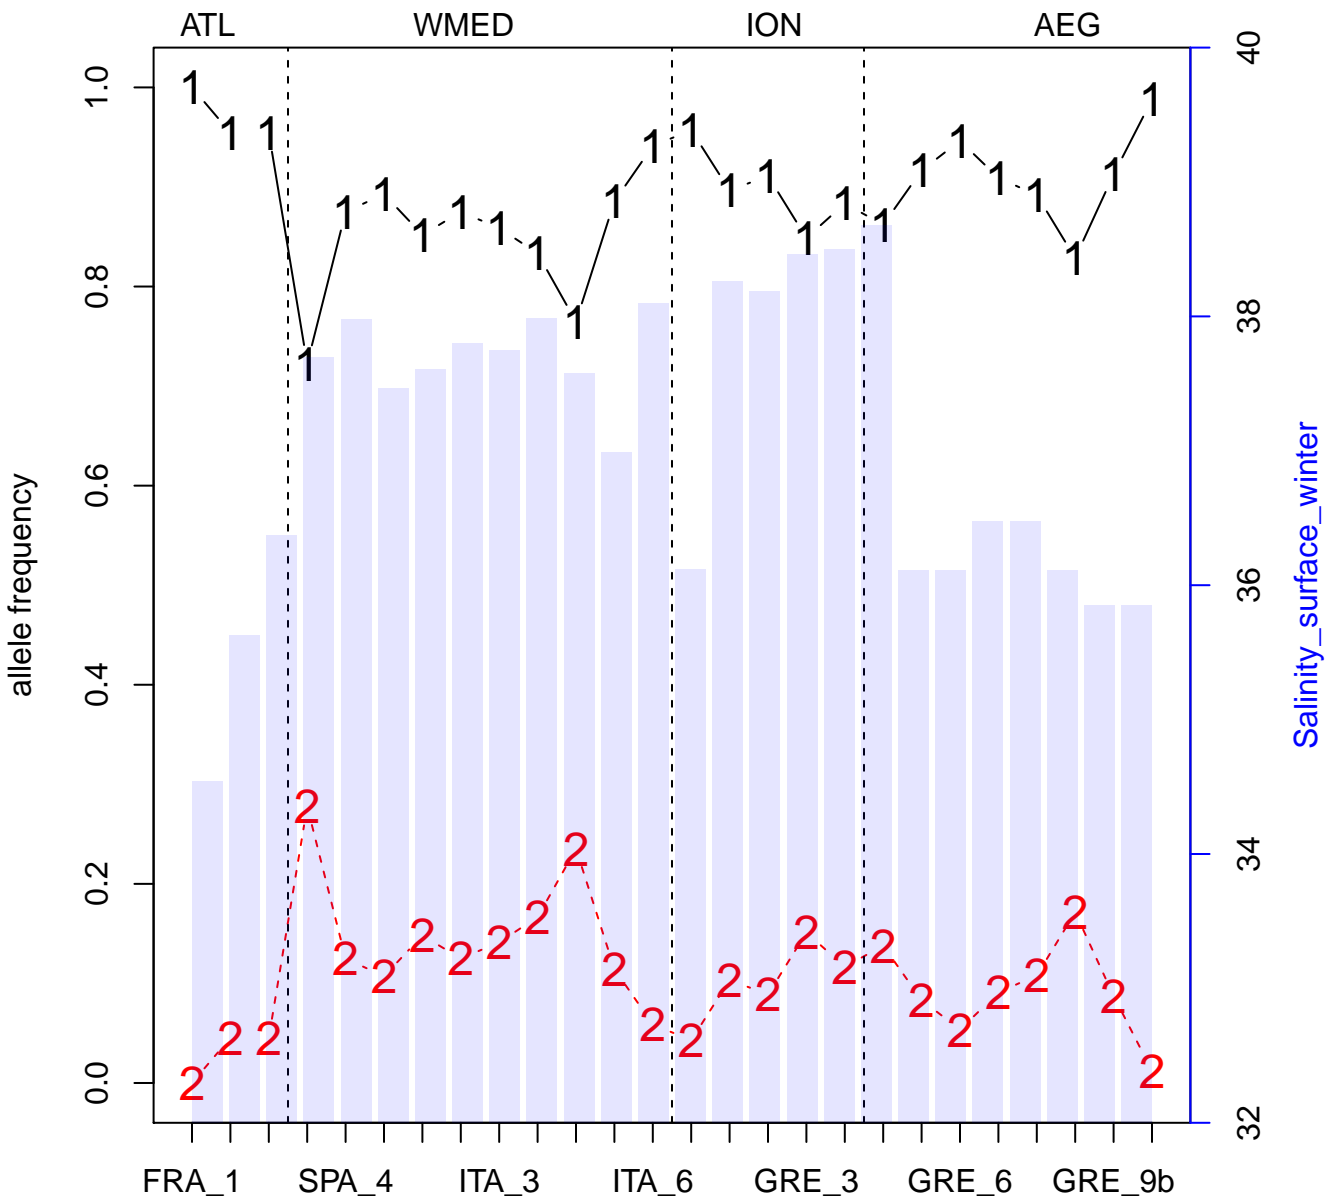

BayEnv

# SNP 960\_86

ATL

WMED

ION

AEG

allele frequency

0.8  
0.6  
0.4  
0.2

40  
38  
36  
34  
32

Salinity\_surface\_winter

FRA\_1

SPA\_4

ITA\_3

ITA\_6

GRE\_3

GRE\_6

GRE\_9b

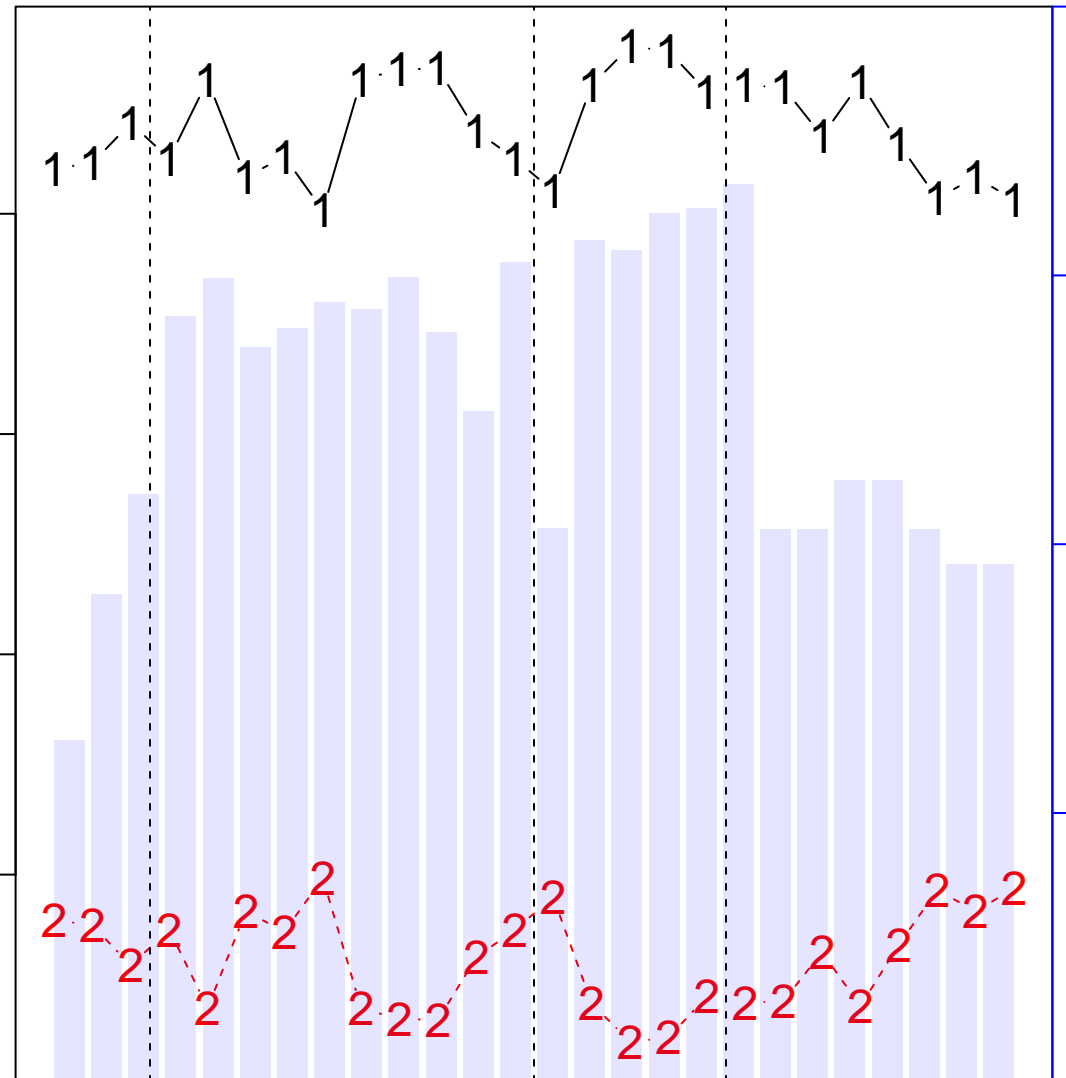

BayEnv

# SNP 1983\_10

ATL

WMED

ION

AEG

allele frequency

1.0  
0.8  
0.6  
0.4  
0.2  
0.0

20  
18  
16  
14  
12  
10

Temperature\_surface\_winter

FRA\_1 SPA\_4 ITA\_3 ITA\_6 GRE\_3 GRE\_6 GRE\_9b

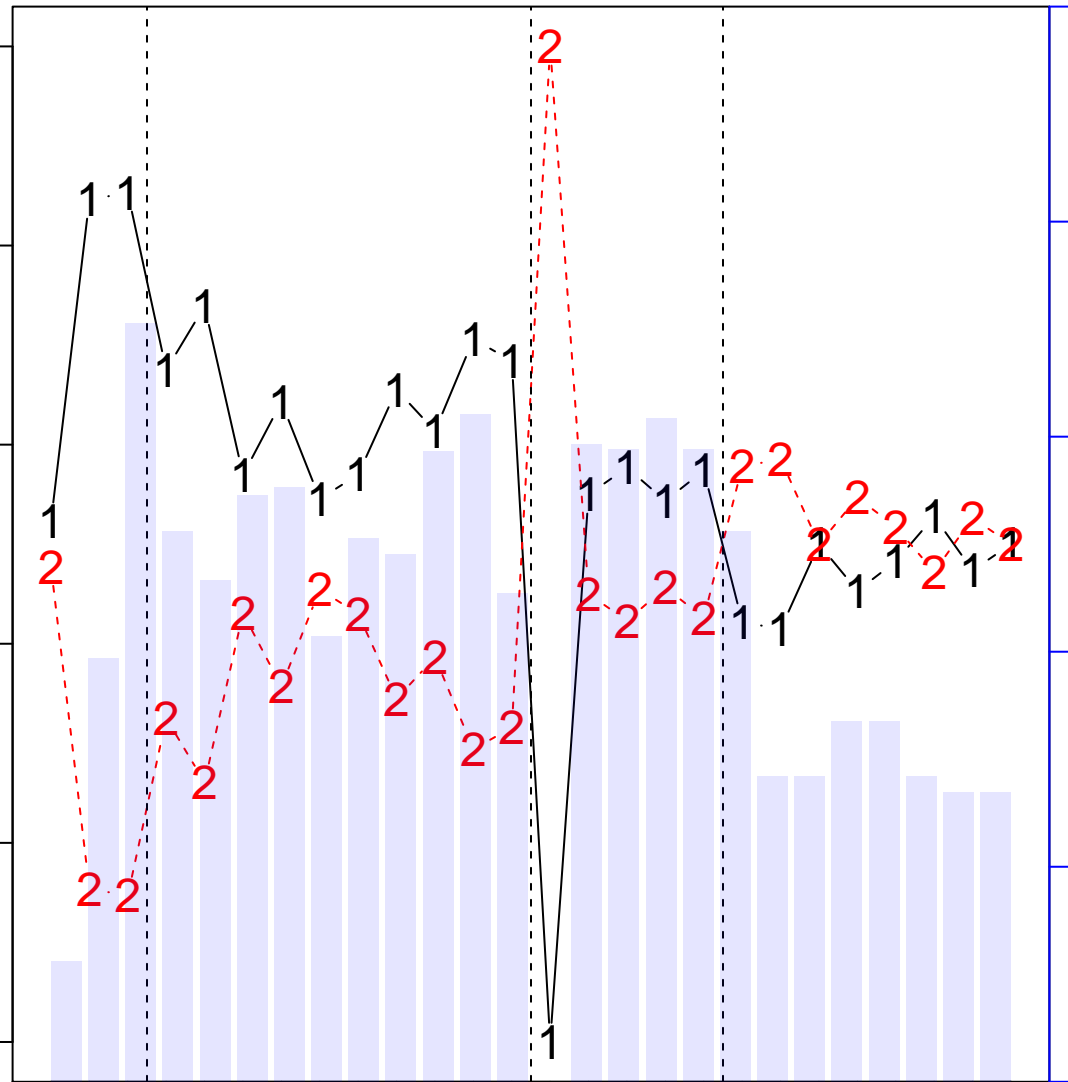

BayEnv

# SNP 1194\_70

ATL

WMED

ION

AEG

allele frequency

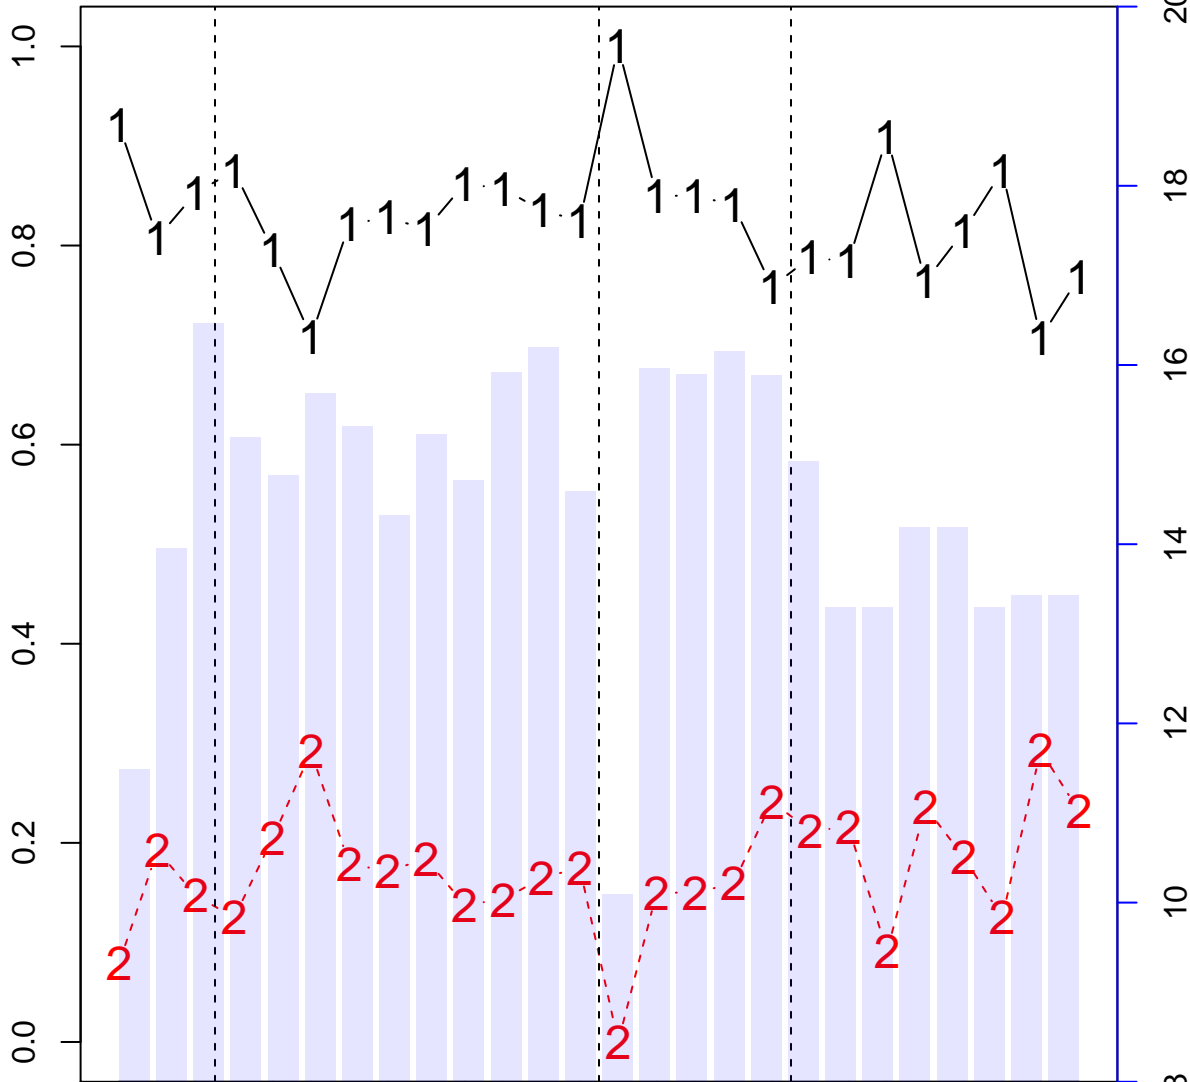

Temperature\_20m\_winter

1.0  
0.8  
0.6  
0.4  
0.2  
0.0  
20  
18  
16  
14  
12  
10  
8

FRA\_1 SPA\_4 ITA\_3 ITA\_6 GRE\_3 GRE\_6 GRE\_9b
